# Supplementary material for: TMT-Based Proteomic Analysis Reveals the Molecular Mechanisms of Sodium Pheophorbide A against Black Spot Needle Blight Caused by Pestalotiopsis neglecta in Pinus sylvestris var. mongolica
Source: MDPI journal article supplement (doi:10.3390/jof10020102), 2024-01-26
Supplement: s1 [file s1]

# Supplementray Materials

**Table S1.** Differentially expressed proteins in *P. neglecta* after treatment with SPA.

| Accession                                           | Sequence Description                                      | Score   | Coverage<br>[%] | Fold<br>change | P-value |
|-----------------------------------------------------|-----------------------------------------------------------|---------|-----------------|----------------|---------|
| Gene.10060::TRINITY_DN16389_c0_g1::g.10060::m.10060 | 40S ribosomal protein S20                                 | 157.918 | 47              | 0.83094        | 0.01302 |
| Gene.101::TRINITY_DN10172_c0_g1::g.101::m.101       | 40S ribosomal protein S16                                 | 295.819 | 7               | 0.79533        | 0.01735 |
| Gene.10267::TRINITY_DN16452_c0_g2::g.10267::m.10267 | Benzoate 4-monooxygenase                                  | 623.239 | 4               | 1.50983        | 0.02603 |
| Gene.10322::TRINITY_DN16467_c0_g1::g.10322::m.10322 | Sexual differentiation process protein isp4               | 584.719 | 5               | 1.73394        | 0.03287 |
| Gene.10367::TRINITY_DN16488_c0_g3::g.10367::m.10367 | Cyclic pyranopterin monophosphate synthase, mitochondrial | 157.532 | 4               | 1.22095        | 0.03621 |
| Gene.10394::TRINITY_DN16500_c0_g1::g.10394::m.10394 | Bifunctional cytochrome P450 / NADPH-P450 reductase       | 1315.06 | 20              | 1.45399        | 0.02816 |
| Gene.10420::TRINITY_DN16509_c0_g1::g.10420::m.10420 | Neutrophil cytosol factor 2                               | 147.132 | 6               | 1.4777         | 0.03805 |
| Gene.10479::TRINITY_DN16533_c0_g2::g.10479::m.10479 | Deoxyuridine 5'-triphosphate nucleotidohydrolase          | 228.024 | 37              | 0.69252        | 0.00487 |
| Gene.10500::TRINITY_DN16540_c0_g2::g.10500::m.10500 | Vacuolar morphogenesis protein 6                          | 171.4   | 8               | 1.23048        | 0.00953 |
| Gene.10529::TRINITY_DN16547_c0_g1::g.10529::m.10529 | Actin-related protein 2/3 complex subunit 3               | 138.658 | 4               | 0.77755        | 0.00885 |
| Gene.1064::TRINITY_DN11092_c1_g5::g.1064::m.1064    | Flavohemoprotein A                                        | 259.225 | 64              | 0.62014        | 0.007   |
| Gene.10646::TRINITY_DN16581_c0_g1::g.10646::m.10646 | GPI-anchored CFEM domain protein ARB_01545                | 58.5362 | 6               | 1.99401        | 0.03057 |
| Gene.10655::TRINITY_DN16584_c0_g1::g.10655::m.10655 | Clustered mitochondria protein homolog                    | 1596.64 | 50              | 0.77096        | 0.0245  |
| Gene.10989::TRINITY_DN16697_c0_g1::g.10989::m.10989 | Cyclic AMP-dependent transcription factor ATF-2           | 97.8265 | 8               | 0.76626        | 0.01514 |
| Gene.11119::TRINITY_DN16746_c0_g2::g.11119::m.11119 | ATP synthase subunit delta, mitochondrial                 | 272.707 | 28              | 0.657          | 0.00967 |
| Gene.11200::TRINITY_DN16770_c0_g3::g.11200::m.11200 | Activator of stress genes 1                               | 280.026 | 3               | 1.29308        | 0.01491 |
| Gene.11294::TRINITY_DN16802_c0_g1::g.11294::m.11294 | 40S ribosomal protein S2                                  | 590.882 | 8               | 1.25432        | 0.02736 |
| Gene.11570::TRINITY_DN16893_c0_g1::g.11570::m.11570 | BolA-like protein 1                                       | 91.2781 | 20              | 0.74043        | 0.03728 |
| Gene.1158::TRINITY_DN11156_c0_g1::g.1158::m.1158    | Pre-rRNA-processing protein, PNO1                         | 371.703 | 14              | 0.75879        | 0.03031 |
| Gene.11689::TRINITY_DN16928_c0_g3::g.11689::m.11689 | Glucan endo-1,3-alpha-glucosidase, agn1                   | 206.068 | 17              | 1.25225        | 0.03723 |
| Gene.11768::TRINITY_DN16953_c0_g2::g.11768::m.11768 | SWI/SNF chromatin-remodeling complex subunit, sol1        | 176.022 | 7               | 0.77253        | 0.00105 |
| Gene.11850::TRINITY_DN16978_c0_g1::g.11850::m.11850 | Vegetative incompatibility protein, HET-E-1               | 60.8474 | 58              | 0.71674        | 0.01031 |
| Gene.11946::TRINITY_DN16993_c0_g1::g.11946::m.11946 | N-alpha-acetyltransferase 30                              | 161.384 | 17              | 1.97471        | 0.04182 |
| Gene.12075::TRINITY_DN17038_c0_g2::g.12075::m.12075 | 54S ribosomal protein L12, mitochondrial                  | 128.257 | 38              | 0.56878        | 0.01654 |
| Gene.12096::TRINITY_DN17043_c0_g1::g.12096::m.12096 | Protein BCP1                                              | 353.214 | 38              | 0.8229         | 0.03779 |
| Gene.12114::TRINITY_DN17046_c0_g4::g.12114::m.12114 | Guanine deaminase                                         | 80.1073 | 9               | 1.6404         | 0.00122 |
| Gene.12223::TRINITY_DN17085_c0_g1::g.12223::m.12223 | Regulator of V-ATPase in vacuolar membrane protein 2      | 44.2838 | 8               | 1.2805         | 0.00042 |
| Gene.12281::TRINITY_DN17100_c1_g2::g.12281::m.12281 | Probable DNA primase large subunit                        | 749.199 | 5               | 0.79319        | 0.03209 |
| Gene.12414::TRINITY_DN17133_c0_g3::g.12414::m.12414 | mRNA export factor rsm1                                   | 72.0182 | 2               | 0.71478        | 0.00086 |
| Gene.12419::TRINITY_DN17137_c0_g2::g.12419::m.12419 | Calcium-binding protein NCS-1                             | 321.627 | 40              | 0.75431        | 0.00669 |
| Gene.12493::TRINITY_DN1715_c0_g1::g.12493::m.12493  | Probable proteasome subunit beta type-2                   | 348.977 | 17              | 0.68161        | 0.01104 |
| Gene.12606::TRINITY_DN17194_c1_g4::g.12606::m.12606 | Mitochondrial fission 1 protein                           | 252.292 | 27              | 0.638          | 0.0188  |
| Gene.12607::TRINITY_DN17195_c0_g2::g.12607::m.12607 | Probable D-xylulose reductase A                           | 115.931 | 24              | 1.82134        | 0.02358 |
| Gene.12867::TRINITY_DN17252_c0_g2::g.12867::m.12867 | Bleomycin hydrolase                                       | 138.658 | 11              | 0.70891        | 0.00626 |
| Gene.12872::TRINITY_DN17253_c0_g1::g.12872::m.12872 | Sphingolipid long chain base-responsive protein PIL1      | 190.274 | 60              | 1.50585        | 0.03836 |
| Gene.12894::TRINITY_DN17257_c0_g1::g.12894::m.12894 | UBX domain-containing protein 1                           | 107.071 | 35              | 0.79533        | 0.02442 |
| Gene.12944::TRINITY_DN17272_c1_g1::g.12944::m.12944 | Single-stranded TG1-3 DNA-binding protein                 | 124.79  | 63              | 0.79211        | 0.03038 |

|                                                      |                                                                      |         |    |         |         |
|------------------------------------------------------|----------------------------------------------------------------------|---------|----|---------|---------|
| Gene.13076::TRINITY_DN17309_c0_g1::g.13076::m.13076  | RING finger protein ETP1 homolog                                     | 313.538 | 2  | 1.23714 | 0.01577 |
| Gene.13103::TRINITY_DN17314_c0_g1::g.13103::m.13103  | Uncharacterized oxidoreductase                                       | 208.764 | 69 | 0.70746 | 0.00308 |
| Gene.13204::TRINITY_DN17341_c0_g1::g.13204::m.13204  | Probable eukaryotic translation initiation factor 2 subunit beta     | 227.254 | 50 | 0.8276  | 0.01538 |
| Gene.13208::TRINITY_DN17342_c0_g2::g.13208::m.13208  | Probable fumarate hydratase, mitochondrial                           | 669.848 | 58 | 0.81464 | 0.02774 |
| Gene.13435::TRINITY_DN17399_c0_g1::g.13435::m.13435  | Myosin regulatory light chain cdc4                                   | 181.03  | 83 | 0.76991 | 0.02569 |
| Gene.13462::TRINITY_DN17404_c0_g5::g.13462::m.13462  | Putative glycine cleavage system H protein, mitochondrial            | 116.316 | 39 | 0.62839 | 0.00105 |
| Gene.13489::TRINITY_DN17410_c0_g2::g.13489::m.13489  | Hit family protein 1                                                 | 72.4034 | 16 | 0.77148 | 0.04045 |
| Gene.13507::TRINITY_DN17416_c0_g1::g.13507::m.13507  | NAD(P)H-dependent D-xylose reductase, xyl1                           | 255.758 | 4  | 1.2779  | 0.02825 |
| Gene.13533::TRINITY_DN17418_c1_g8::g.13533::m.13533  | Ammonium transporter 1                                               | 497.278 | 3  | 2.44687 | 0.00833 |
| Gene.1380::TRINITY_DN11320_c1_g1::g.1380::m.1380     | Methyltransferase, ustM                                              | 128.257 | 28 | 1.28311 | 0.00646 |
| Gene.13831::TRINITY_DN17504_c0_g1::g.13831::m.13831  | Xanthocillin biosynthesis cluster protein D                          | 94.7449 | 12 | 1.22845 | 0.0067  |
| Gene.13904::TRINITY_DN17526_c0_g1::g.13904::m.13904  | NADH-dependent flavin oxidoreductase, nadA                           | 405.601 | 29 | 1.25141 | 0.00979 |
| Gene.14155::TRINITY_DN17584_c0_g3::g.14155::m.14155  | NA polymerase-associated protein C651.09c                            | 126.716 | 7  | 1.24757 | 0.00202 |
| Gene.14393::TRINITY_DN17631_c0_g3::g.14393::m.14393  | Protein IVY1                                                         | 102.449 | 5  | 1.23547 | 0.04438 |
| Gene.14578::TRINITY_DN17679_c0_g3::g.14578::m.14578  | Secretory component protein SHR3                                     | 60.4622 | 29 | 1.32919 | 0.03613 |
| Gene.14582::TRINITY_DN1767_c0_g2::g.14582::m.14582   | Mitochondrial import receptor subunit tom22                          | 149.058 | 28 | 0.63177 | 0.01677 |
| Gene.14686::TRINITY_DN17702_c0_g8::g.14686::m.14686  | Mitochondrial protein cyt-4                                          | 628.632 | 9  | 0.75182 | 0.01388 |
| Gene.14752::TRINITY_DN17717_c0_g1::g.14752::m.14752  | Phosphatidylinositol 4,5-bisphosphate-binding protein                | 300.056 | 16 | 1.24551 | 0.00186 |
| Gene.14900::TRINITY_DN17742_c0_g4::g.14900::m.14900  | Ferrochelatase, mitochondrial                                        | 426.017 | 41 | 0.82815 | 0.0232  |
| Gene.15070::TRINITY_DN17778_c0_g1::g.15070::m.15070  | Protein transport protein SEC61 subunit alpha                        | 935.636 | 14 | 1.41895 | 0.00325 |
| Gene.15106::TRINITY_DN17785_c1_g5::g.15106::m.15106  | Ornithine aminotransferase                                           | 642.884 | 52 | 0.7613  | 0.02381 |
| Gene.15162::TRINITY_DN17799_c0_g1::g.15162::m.15162  | Phosphatidylglycerol/phosphatidylinositol transfer protein           | 189.504 | 42 | 1.3261  | 0.04914 |
| Gene.15167::TRINITY_DN17800_c0_g1::g.15167::m.15167  | 40S ribosomal protein S21                                            | 154.451 | 45 | 1.31303 | 0.00863 |
| Gene.15236::TRINITY_DN17818_c0_g1::g.15236::m.15236  | Methionine aminopeptidase 1                                          | 428.328 | 38 | 0.78991 | 0.00232 |
| Gene.15286::TRINITY_DN17832_c0_g2::g.15286::m.15286  | 3,4-dihydroxy-2-butanone 4-phosphate synthase                        | 265.388 | 56 | 0.70455 | 0.01971 |
| Gene.15351::TRINITY_DN17839_c0_g1::g.15351::m.15351  | Rho GDP-dissociation inhibitor                                       | 177.563 | 64 | 0.79587 | 0.0314  |
| Gene.15486::TRINITY_DN17870_c0_g1::g.15486::m.15486  | Succinate--CoA ligase [ADP-forming] subunit alpha, mitochondrial     | 326.25  | 37 | 0.81683 | 0.00463 |
| Gene.15571::TRINITY_DN17883_c0_g1::g.15571::m.15571  | GTPase-activating protein, GYP7                                      | 631.713 | 4  | 1.25781 | 0.00185 |
| Gene.15710::TRINITY_DN178_c0_g1::g.15710::m.15710    | ATP synthase assembly factor FMC1, mitochondrial                     | 51.9878 | 15 | 1.37208 | 0.00185 |
| Gene.15800::TRINITY_DN17919_c0_g3::g.15800::m.15800  | Microsomal glutathione S-transferase 3                               | 77.411  | 15 | 1.95081 | 0.00526 |
| Gene.15833::TRINITY_DN17927_c1_g4::g.15833::m.15833  | Glyoxalase 3                                                         | 78.5666 | 25 | 1.58398 | 0.04093 |
| Gene.15852::TRINITY_DN17933_c0_g3::g.15852::m.15852  | Cytochrome c oxidase subunit 6, mitochondrial                        | 57.3806 | 10 | 0.45278 | 0.00422 |
| Gene.1586::TRINITY_DN11491_c0_g1::g.1586::m.1586     | DNA-directed RNA polymerase II subunit RPB9                          | 91.2781 | 3  | 0.75446 | 0.02215 |
| Gene.15860::TRINITY_DN17934_c2_g15::g.15860::m.15860 | Putative 26S proteasome complex subunit sem-1                        | 72.4034 | 32 | 0.5064  | 0.02429 |
| Gene.15986::TRINITY_DN17950_c0_g2::g.15986::m.15986  | Tyrosine--tRNA ligase, mitochondrial                                 | 629.402 | 25 | 0.72612 | 0.00879 |
| Gene.16301::TRINITY_DN18014_c1_g3::g.16301::m.16301  | Uncharacterized transcriptional regulatory protein C15D4.02          | 85.1149 | 2  | 1.31036 | 0.00757 |
| Gene.16335::TRINITY_DN18020_c0_g2::g.16335::m.16335  | 40S ribosomal protein S15                                            | 232.646 | 23 | 0.7194  | 0.00595 |
| Gene.16569::TRINITY_DN18053_c0_g5::g.16569::m.16569  | 2,3-dihydroxybenzoate decarboxylase                                  | 201.06  | 3  | 1.2531  | 0.01843 |
| Gene.16616::TRINITY_DN18059_c0_g2::g.16616::m.16616  | NADH dehydrogenase [ubiquinone] 1 alpha subcomplex assembly factor 3 | 62.003  | 18 | 0.82205 | 0.03211 |
| Gene.16630::TRINITY_DN18061_c0_g1::g.16630::m.16630  | 40S ribosomal protein S28                                            | 129.028 | 30 | 0.81105 | 0.01723 |
| Gene.16658::TRINITY_DN18066_c1_g12::g.16658::m.16658 | Vacuolar protein sorting-associated protein 41 homolog               | 199.904 | 4  | 1.26112 | 0.01993 |
| Gene.1696::TRINITY_DN11594_c0_g1::g.1696::m.1696     | NADH-ubiquinone oxidoreductase 23 kDa subunit, mitochondrial         | 359.762 | 41 | 1.25602 | 0.00657 |

|                                                      |                                                                                                                           |         |    |         |         |
|------------------------------------------------------|---------------------------------------------------------------------------------------------------------------------------|---------|----|---------|---------|
| Gene.17002::TRINITY_DN18107_c1_g1::g.17002::m.17002  | Nuclear distribution protein, PAC1                                                                                        | 627.476 | 17 | 1.29973 | 0.00398 |
| Gene.17208::TRINITY_DN18131_c1_g9::g.17208::m.17208  | Arginine metabolism regulation protein II                                                                                 | 57.7658 | 2  | 1.66002 | 0.00039 |
| Gene.17295::TRINITY_DN18137_c0_g17::g.17295::m.17295 | Uncharacterized oxidoreductase C26F1.07                                                                                   | 224.172 | 11 | 1.21239 | 0.01273 |
| Gene.17340::TRINITY_DN18141_c1_g13::g.17340::m.17340 | Phosphatidylserine decarboxylase proenzyme 1, mitochondrial                                                               | 384.8   | 16 | 0.78336 | 0.02447 |
| Gene.17343::TRINITY_DN18141_c1_g16::g.17343::m.17343 | Molybdopterin synthase catalytic subunit                                                                                  | 263.077 | 6  | 0.76115 | 0.00371 |
| Gene.17355::TRINITY_DN18141_c1_g7::g.17355::m.17355  | 60 kDa lysophospholipase                                                                                                  | 317.775 | 25 | 0.78253 | 0.04835 |
| Gene.17472::TRINITY_DN18150_c0_g7::g.17472::m.17472  | Reticulocyte-binding protein 2 homolog a                                                                                  | 59.6918 | 2  | 0.79647 | 0.03988 |
| Gene.17654::TRINITY_DN18184_c1_g12::g.17654::m.17654 | Transcriptional regulator RPN4                                                                                            | 93.9745 | 6  | 0.689   | 0.04913 |
| Gene.17713::TRINITY_DN18185_c0_g1::g.17713::m.17713  | UBP9-binding protein, bun107                                                                                              | 191.045 | 6  | 1.21157 | 0.01472 |
| Gene.17795::TRINITY_DN18190_c1_g1::g.17795::m.17795  | Uncharacterized protein YJL213W                                                                                           | 45.4394 | 16 | 1.34283 | 0.04048 |
| Gene.17797::TRINITY_DN18190_c1_g10::g.17797::m.17797 | Uncharacterized protein PYUK71.03c                                                                                        | 668.692 | 25 | 1.24757 | 0.01714 |
| Gene.17835::TRINITY_DN18191_c1_g1::g.17835::m.17835  | Nucleoporin POM33                                                                                                         | 350.903 | 27 | 1.25094 | 0.03085 |
| Gene.17838::TRINITY_DN18191_c1_g4::g.17838::m.17838  | Temperature-induced lipocalin-1                                                                                           | 59.3066 | 24 | 9.10101 | 0.00538 |
| Gene.17875::TRINITY_DN18199_c0_g10::g.17875::m.17875 | Copper amine oxidase 1                                                                                                    | 861.677 | 29 | 1.39004 | 0.00066 |
| Gene.17879::TRINITY_DN18199_c0_g2::g.17879::m.17879  | Splicing factor 3B subunit 4                                                                                              | 267.314 | 5  | 0.77357 | 0.01656 |
| Gene.17904::TRINITY_DN18200_c1_g1::g.17904::m.17904  | 60S ribosomal protein L23-B                                                                                               | 241.506 | 17 | 1.68261 | 0.00808 |
| Gene.17937::TRINITY_DN18205_c3_g16::g.17937::m.17937 | Pyridoxal phosphate homeostasis protein                                                                                   | 201.06  | 27 | 0.74469 | 0.00248 |
| Gene.18::TRINITY_DN10041_c0_g1::g.18::m.18           | Ribosome-releasing factor 2, mitochondrial                                                                                | 597.045 | 5  | 1.23003 | 0.04671 |
| Gene.18091::TRINITY_DN18224_c2_g4::g.18091::m.18091  | Catalase                                                                                                                  | 613.609 | 21 | 1.67261 | 0.0215  |
| Gene.18227::TRINITY_DN18240_c1_g1::g.18227::m.18227  | NEDD8-specific protease 2                                                                                                 | 105.916 | 5  | 1.21774 | 0.01676 |
| Gene.18345::TRINITY_DN18257_c0_g2::g.18345::m.18345  | 40S ribosomal protein S9                                                                                                  | 163.31  | 65 | 1.3015  | 0.01379 |
| Gene.18346::TRINITY_DN18257_c0_g3::g.18346::m.18346  | 40S ribosomal protein S9-A                                                                                                | 312.768 | 24 | 1.75023 | 0.00137 |
| Gene.18356::TRINITY_DN18258_c0_g2::g.18356::m.18356  | Pinoresinol reductase 2                                                                                                   | 55.0694 | 15 | 1.92826 | 3.8E-05 |
| Gene.18439::TRINITY_DN18267_c2_g7::g.18439::m.18439  | Uncharacterized protein YJL213W                                                                                           | 132.109 | 10 | 1.22103 | 0.03057 |
| Gene.18454::TRINITY_DN18269_c1_g1::g.18454::m.18454  | Uncharacterized membrane protein YJR124C                                                                                  | 263.462 | 14 | 1.32378 | 0.04306 |
| Gene.18573::TRINITY_DN18277_c0_g4::g.18573::m.18573  | Uncharacterized protein C354.08c                                                                                          | 427.557 | 2  | 1.51467 | 0.0031  |
| Gene.1873::TRINITY_DN11773_c0_g1::g.1873::m.1873     | C-1-tetrahydrofolate synthase, cytoplasmic                                                                                | 1187.17 | 48 | 0.78761 | 0.02697 |
| Gene.18766::TRINITY_DN18291_c0_g2::g.18766::m.18766  | Putative fungistatic metabolite                                                                                           | 58.151  | 14 | 1.70758 | 0.01876 |
| Gene.18956::TRINITY_DN18310_c3_g5::g.18956::m.18956  | Probable dihydrolipoyllysine-residue succinyltransferase component of 2-oxoglutarate dehydrogenase complex, mitochondrial | 481.1   | 47 | 0.79533 | 0.02147 |
| Gene.19092::TRINITY_DN18321_c2_g6::g.19092::m.19092  | Histidine biosynthesis trifunctional protein                                                                              | 1296.18 | 44 | 0.75901 | 0.00774 |
| Gene.19190::TRINITY_DN18327_c3_g6::g.19190::m.19190  | Mannose-1-phosphate guanylttransferase                                                                                    | 641.728 | 50 | 0.82871 | 0.00242 |
| Gene.19251::TRINITY_DN1832_c0_g1::g.19251::m.19251   | Dicarboxylic amino acid permease                                                                                          | 382.489 | 5  | 1.79367 | 0.02976 |
| Gene.19281::TRINITY_DN18331_c0_g8::g.19281::m.19281  | Probable secreted lipase ARB_02369                                                                                        | 179.104 | 9  | 1.77778 | 0.01863 |
| Gene.194::TRINITY_DN10320_c0_g1::g.194::m.194        | Peroxisomal multifunctional enzyme type 2                                                                                 | 100.138 | 7  | 2.52113 | 0.04521 |
| Gene.19591::TRINITY_DN18354_c0_g19::g.19591::m.19591 | Putative glutathione-dependent formaldehyde-activating enzyme                                                             | 43.5134 | 7  | 1.47893 | 0.00523 |
| Gene.19635::TRINITY_DN18357_c0_g1::g.19635::m.19635  | Pyruvate decarboxylase                                                                                                    | 1047.73 | 6  | 1.56849 | 0.02976 |
| Gene.19663::TRINITY_DN18362_c0_g2::g.19663::m.19663  | Heat shock protein SSC1, mitochondrial                                                                                    | 106.301 | 28 | 2.125   | 0.00674 |
| Gene.1972::TRINITY_DN11828_c0_g2::g.1972::m.1972     | UPF0676 protein C1494.01                                                                                                  | 60.077  | 13 | 1.20832 | 0.03941 |
| Gene.19755::TRINITY_DN18365_c0_g2::g.19755::m.19755  | 60S ribosomal protein L10a                                                                                                | 361.303 | 28 | 0.81159 | 0.04803 |
| Gene.19848::TRINITY_DN18370_c2_g3::g.19848::m.19848  | Protein-lysine N-methyltransferase EFM4                                                                                   | 157.532 | 8  | 1.537   | 0.0081  |
| Gene.19894::TRINITY_DN18373_c0_g3::g.19894::m.19894  | Heat shock protein 60                                                                                                     | 959.903 | 61 | 0.7369  | 0.03357 |

|                                                      |                                                              |         |    |         |         |
|------------------------------------------------------|--------------------------------------------------------------|---------|----|---------|---------|
| Gene.20005::TRINITY_DN18383_c0_g4::g.20005::m.20005  | Poly [ADP-ribose] polymerase 2                               | 326.25  | 12 | 0.74571 | 0.02553 |
| Gene.20174::TRINITY_DN18390_c1_g15::g.20174::m.20174 | Chitobiosyldiphosphodolichol beta-mannosyltransferase        | 327.405 | 16 | 1.26112 | 0.00172 |
| Gene.20181::TRINITY_DN18390_c1_g4::g.20181::m.20181  | Uncharacterized J domain-containing protein C3E7.11c         | 211.846 | 41 | 0.77515 | 0.00934 |
| Gene.202::TRINITY_DN1032_c0_g1::g.202::m.202         | tRNA-aminoacylation cofactor, ARC1                           | 182.185 | 50 | 0.73661 | 0.03453 |
| Gene.20269::TRINITY_DN18396_c0_g2::g.20269::m.20269  | 60S ribosomal protein L12                                    | 288.886 | 52 | 0.82039 | 0.00721 |
| Gene.20316::TRINITY_DN18400_c0_g5::g.20316::m.20316  | Membrane primary amine oxidase                               | 297.36  | 36 | 1.80374 | 0.00119 |
| Gene.20425::TRINITY_DN18403_c0_g6::g.20425::m.20425  | Peptide-N4-(N-acetyl-beta-glucosaminy)l asparagine amidase A | 198.364 | 2  | 2.00702 | 0.00811 |
| Gene.20433::TRINITY_DN18404_c0_g2::g.20433::m.20433  | Uncharacterized isomerase YHI9                               | 74.7146 | 19 | 0.58746 | 0.00764 |
| Gene.2044::TRINITY_DN11859_c0_g1::g.2044::m.2044     | Probable helicase mot1                                       | 1607.42 | 12 | 1.22763 | 0.00842 |
| Gene.20649::TRINITY_DN18413_c2_g1::g.20649::m.20649  | Uncharacterized mitochondrial carrier C8C9.12c               | 308.531 | 12 | 0.79718 | 0.00371 |
| Gene.20704::TRINITY_DN18416_c0_g2::g.20704::m.20704  | Asparagine synthetase [glutamine-hydrolyzing] 1              | 286.189 | 17 | 0.82365 | 0.01301 |
| Gene.20737::TRINITY_DN18421_c0_g8::g.20737::m.20737  | Uncharacterized protein C13G1.09                             | 315.079 | 11 | 0.83008 | 0.02942 |
| Gene.20840::TRINITY_DN18428_c0_g2::g.20840::m.20840  | Transcription factor himD                                    | 74.7146 | 4  | 1.22469 | 0.02631 |
| Gene.20899::TRINITY_DN18431_c0_g3::g.20899::m.20899  | Malate dehydrogenase, mitochondrial                          | 312.768 | 69 | 0.66159 | 0.02604 |
| Gene.20948::TRINITY_DN18435_c2_g1::g.20948::m.20948  | Uncharacterized RING finger protein P32A8.03c                | 120.553 | 5  | 0.80693 | 0.03544 |
| Gene.21021::TRINITY_DN18437_c0_g1::g.21021::m.21021  | Ergothioneine biosynthesis protein 1                         | 652.514 | 12 | 0.72414 | 0.00434 |
| Gene.21089::TRINITY_DN18441_c1_g22::g.21089::m.21089 | Aromatic amino acid aminotransferase C1773.13                | 182.185 | 2  | 1.27964 | 0.0013  |
| Gene.21107::TRINITY_DN18441_c1_g7::g.21107::m.21107  | Uncharacterized membrane protein YMR155W                     | 174.866 | 2  | 1.45741 | 0.04476 |
| Gene.21112::TRINITY_DN18441_c1_g9::g.21112::m.21112  | Beta-1,3-glucan-binding protein                              | 219.55  | 16 | 1.75482 | 0.01483 |
| Gene.21117::TRINITY_DN18443_c0_g1::g.21117::m.21117  | Protein sfk1                                                 | 73.559  | 4  | 1.30985 | 0.00268 |
| Gene.21160::TRINITY_DN18444_c0_g27::g.21160::m.21160 | Secondary metabolism regulator LAE1                          | 277.715 | 5  | 1.731   | 0.02191 |
| Gene.21251::TRINITY_DN18452_c1_g14::g.21251::m.21251 | Universal stress protein A family protein C25B2.10           | 154.451 | 11 | 1.28833 | 0.00435 |
| Gene.21258::TRINITY_DN18452_c1_g19::g.21258::m.21258 | Putative transferase CAF17, mitochondrial                    | 285.419 | 14 | 0.71674 | 0.02726 |
| Gene.21285::TRINITY_DN18452_c1_g6::g.21285::m.21285  | T-complex protein 1 subunit gamma                            | 838.18  | 66 | 0.79856 | 0.00228 |
| Gene.21303::TRINITY_DN18454_c1_g12::g.21303::m.21303 | Respiration factor 2                                         | 112.079 | 3  | 1.20066 | 0.00773 |
| Gene.21613::TRINITY_DN18467_c1_g2::g.21613::m.21613  | T-complex protein 1 subunit zeta                             | 764.607 | 40 | 0.81239 | 0.02256 |
| Gene.21665::TRINITY_DN18469_c0_g1::g.21665::m.21665  | Inosine triphosphate pyrophosphatase                         | 300.056 | 47 | 0.82396 | 0.01163 |
| Gene.21700::TRINITY_DN18471_c0_g13::g.21700::m.21700 | Probable phospholipase C20G8.02, mitochondrial               | 283.878 | 2  | 1.30376 | 0.01962 |
| Gene.21723::TRINITY_DN18471_c0_g6::g.21723::m.21723  | DNA-binding protein HEXBP                                    | 147.517 | 75 | 0.79964 | 0.02204 |
| Gene.2177::TRINITY_DN11902_c0_g1::g.2177::m.2177     | Cytochrome P450 monooxygenase, sdnE                          | 188.734 | 4  | 1.53443 | 0.0398  |
| Gene.21904::TRINITY_DN18478_c1_g6::g.21904::m.21904  | UPF0588 membrane protein C20F10.02c                          | 161.77  | 10 | 1.24841 | 0.00166 |
| Gene.21921::TRINITY_DN1847_c0_g1::g.21921::m.21921   | Alanyl-tRNA editing protein Aarsd1                           | 51.2174 | 31 | 0.66833 | 0.04298 |
| Gene.21940::TRINITY_DN18480_c1_g2::g.21940::m.21940  | Aldehyde reductase 2                                         | 246.899 | 10 | 1.39577 | 0.03069 |
| Gene.2206::TRINITY_DN11913_c0_g2::g.2206::m.2206     | Translocator protein homolog                                 | 126.716 | 25 | 1.9975  | 0.00021 |
| Gene.22089::TRINITY_DN18488_c2_g13::g.22089::m.22089 | 13 kDa ribonucleoprotein-associated protein                  | 181.03  | 13 | 0.64249 | 0.01568 |
| Gene.22151::TRINITY_DN18489_c2_g3::g.22151::m.22151  | Spermidine synthase                                          | 458.759 | 47 | 0.76263 | 0.00178 |
| Gene.22164::TRINITY_DN18489_c2_g8::g.22164::m.22164  | Probable E3 ubiquitin-protein ligase WAVH2                   | 56.9954 | 5  | 1.24169 | 0.04086 |
| Gene.22218::TRINITY_DN18490_c1_g9::g.22218::m.22218  | Uncharacterized protein YEL023C                              | 49.2914 | 1  | 1.65722 | 0.02814 |
| Gene.22411::TRINITY_DN18507_c0_g3::g.22411::m.22411  | Heat shock protein hsp88                                     | 1060.44 | 66 | 0.80995 | 0.03876 |
| Gene.22454::TRINITY_DN18511_c3_g14::g.22454::m.22454 | 60S acidic ribosomal protein P1                              | 130.183 | 9  | 0.64564 | 0.01167 |
| Gene.22461::TRINITY_DN18511_c3_g2::g.22461::m.22461  | 2-oxoglutarate-Fe(II) type oxidoreductase hxnY               | 146.747 | 59 | 1.3996  | 0.03335 |
| Gene.22543::TRINITY_DN18513_c4_g16::g.22543::m.22543 | GrpE protein homolog, mitochondrial                          | 255.373 | 53 | 0.66556 | 0.042   |

|                                                      |                                                                    |         |    |         |         |
|------------------------------------------------------|--------------------------------------------------------------------|---------|----|---------|---------|
| Gene.22682::TRINITY_DN18517_c1_g9::g.22682::m.22682  | Zinc-type alcohol dehydrogenase-like protein C16A3.02c             | 199.134 | 28 | 0.7994  | 0.02592 |
| Gene.22745::TRINITY_DN18523_c0_g3::g.22745::m.22745  | N14-3-3 family protein artA                                        | 291.197 | 73 | 0.83262 | 0.02938 |
| Gene.22753::TRINITY_DN18523_c0_g7::g.22753::m.22753  | Reticulocyte-binding protein 2 homolog a                           | 50.447  | 1  | 2.23276 | 0.04862 |
| Gene.22838::TRINITY_DN18529_c2_g2::g.22838::m.22838  | Dothistromin biosynthesis peroxidase, dotB                         | 228.794 | 3  | 1.43112 | 0.0294  |
| Gene.22975::TRINITY_DN18534_c1_g5::g.22975::m.22975  | Sphingolipid C9-methyltransferase                                  | 124.405 | 24 | 2.69354 | 0.00643 |
| Gene.23010::TRINITY_DN18535_c0_g16::g.23010::m.23010 | Dihydrofolate reductase                                            | 135.576 | 16 | 0.79021 | 0.0097  |
| Gene.23060::TRINITY_DN18536_c3_g18::g.23060::m.23060 | Mitochondrial import receptor subunit tom70                        | 909.057 | 55 | 0.82896 | 0.01604 |
| Gene.23077::TRINITY_DN18536_c3_g27::g.23077::m.23077 | Mannose-6-phosphate isomerase                                      | 235.343 | 7  | 1.75229 | 0.00868 |
| Gene.23123::TRINITY_DN18537_c1_g15::g.23123::m.23123 | U3 small nucleolar RNA-associated protein 5                        | 133.265 | 16 | 0.82346 | 0.01725 |
| Gene.23196::TRINITY_DN18539_c0_g14::g.23196::m.23196 | tRNA (guanine-N(7)-)-methyltransferase non-catalytic subunit trm82 | 301.982 | 15 | 0.80102 | 0.00059 |
| Gene.2333::TRINITY_DN11983_c0_g1::g.2333::m.2333     | Replication termination factor 2                                   | 122.865 | 3  | 0.83008 | 0.04722 |
| Gene.23366::TRINITY_DN18553_c0_g1::g.23366::m.23366  | ATP synthase subunit gamma, mitochondrial                          | 310.071 | 67 | 0.8218  | 0.00478 |
| Gene.23431::TRINITY_DN18560_c0_g3::g.23431::m.23431  | Glutamine synthetase                                               | 663.685 | 2  | 0.66389 | 0.01378 |
| Gene.2344::TRINITY_DN11985_c0_g1::g.2344::m.2344     | Orotate phosphoribosyltransferase                                  | 283.493 | 47 | 0.81184 | 0.01483 |
| Gene.23467::TRINITY_DN18562_c0_g14::g.23467::m.23467 | Autophagy-related protein 11                                       | 1475.69 | 1  | 1.28311 | 0.03577 |
| Gene.23498::TRINITY_DN18562_c0_g25::g.23498::m.23498 | Trans-enoyl reductase fsr4                                         | 314.694 | 38 | 1.56739 | 0.01073 |
| Gene.2358::TRINITY_DN12003_c0_g2::g.2358::m.2358     | Homocysteine synthase                                              | 431.795 | 5  | 1.80767 | 0.03045 |
| Gene.23683::TRINITY_DN18568_c2_g19::g.23683::m.23683 | Probable nitrilase C965.09                                         | 84.7297 | 2  | 1.80421 | 0.02415 |
| Gene.23766::TRINITY_DN18575_c0_g16::g.23766::m.23766 | TATA element modulatory factor                                     | 81.6481 | 4  | 1.41061 | 0.00182 |
| Gene.23785::TRINITY_DN18575_c0_g25::g.23785::m.23785 | Bifunctional decalin synthase calF                                 | 352.058 | 5  | 1.22552 | 0.02478 |
| Gene.24072::TRINITY_DN18582_c0_g23::g.24072::m.24072 | Laccase-1                                                          | 643.654 | 17 | 2.74703 | 0.00056 |
| Gene.24075::TRINITY_DN18582_c0_g24::g.24075::m.24075 | Laccase-2                                                          | 601.282 | 2  | 1.8436  | 0.00762 |
| Gene.24092::TRINITY_DN18582_c0_g3::g.24092::m.24092  | WSC domain-containing protein ARB_07867                            | 849.351 | 32 | 1.8342  | 0.01066 |
| Gene.24116::TRINITY_DN18582_c0_g8::g.24116::m.24116  | Laccase-1                                                          | 646.351 | 10 | 1.6121  | 0.0213  |
| Gene.24133::TRINITY_DN18583_c0_g8::g.24133::m.24133  | Heat shock 70 kDa protein                                          | 731.48  | 56 | 0.6835  | 0.01143 |
| Gene.24177::TRINITY_DN18586_c0_g11::g.24177::m.24177 | Isoleucine--tRNA ligase, chloroplastic / mitochondrial             | 641.728 | 18 | 0.76493 | 0.02219 |
| Gene.24250::TRINITY_DN18589_c1_g4::g.24250::m.24250  | Ankyrin-1                                                          | 197.978 | 5  | 0.77778 | 0.00204 |
| Gene.24290::TRINITY_DN18590_c2_g3::g.24290::m.24290  | Glutathione peroxidase-like peroxiredoxin 2                        | 202.986 | 22 | 1.36913 | 0.00407 |
| Gene.24391::TRINITY_DN18592_c2_g16::g.24391::m.24391 | NAD(P) transhydrogenase, mitochondrial                             | 1055.05 | 4  | 1.46812 | 0.02912 |
| Gene.24446::TRINITY_DN18593_c0_g2::g.24446::m.24446  | Mitochondrial protein import protein mas5                          | 319.701 | 43 | 0.82039 | 0.02619 |
| Gene.2445::TRINITY_DN12062_c0_g2::g.2445::m.2445     | 25-hydroxycholesterol 7-alpha-hydroxylase (Fragment)               | 93.2041 | 6  | 1.30808 | 0.0331  |
| Gene.2466::TRINITY_DN1206_c0_g1::g.2466::m.2466      | Tripeptidyl-peptidase sed1                                         | 586.645 | 4  | 1.35756 | 0.02477 |
| Gene.24668::TRINITY_DN18601_c1_g16::g.24668::m.24668 | C2H2 finger domain transcription factor crzA                       | 400.979 | 3  | 0.6802  | 0.0198  |
| Gene.24704::TRINITY_DN18602_c0_g14::g.24704::m.24704 | Serine/threonine-protein kinase RIM15                              | 412.535 | 1  | 1.83019 | 0.02033 |
| Gene.24777::TRINITY_DN18603_c0_g14::g.24777::m.24777 | Pyruvate dehydrogenase complex protein X component, mitochondrial  | 154.451 | 51 | 0.74723 | 0.00432 |
| Gene.24803::TRINITY_DN18603_c0_g23::g.24803::m.24803 | Galactose/lactose metabolism regulatory protein GAL80              | 126.716 | 29 | 1.36967 | 0.01193 |
| Gene.24841::TRINITY_DN18604_c0_g9::g.24841::m.24841  | 5-methylcytosine rRNA methyltransferase NSUN4                      | 83.9593 | 5  | 0.78625 | 0.0333  |
| Gene.2487::TRINITY_DN12084_c0_g3::g.2487::m.2487     | Elongator complex protein 4                                        | 146.747 | 3  | 1.55754 | 0.00378 |
| Gene.24879::TRINITY_DN18607_c1_g19::g.24879::m.24879 | Probable beta-glucosidase I                                        | 939.488 | 8  | 1.38663 | 0.00154 |
| Gene.24887::TRINITY_DN18607_c1_g21::g.24887::m.24887 | U3 small nucleolar RNA-associated protein 20                       | 440.269 | 3  | 1.29797 | 0.00929 |
| Gene.24918::TRINITY_DN18607_c1_g6::g.24918::m.24918  | GBH/ACA ribonucleoprotein complex subunit GAR1                     | 194.897 | 20 | 0.66945 | 0.01667 |
| Gene.24941::TRINITY_DN18608_c1_g7::g.24941::m.24941  | Serine/threonine-protein kinase ppk16                              | 329.331 | 3  | 1.33827 | 0.01081 |

|                                                      |                                                                    |         |    |         |         |
|------------------------------------------------------|--------------------------------------------------------------------|---------|----|---------|---------|
| Gene.25250::TRINITY_DN18617_c1_g22::g.25250::m.25250 | Uncharacterized HTH La-type RNA-binding protein C1527.03           | 83.9593 | 26 | 0.70746 | 0.01231 |
| Gene.25255::TRINITY_DN18617_c1_g27::g.25255::m.25255 | Uncharacterized protein C736.07c                                   | 47.3654 | 3  | 1.20994 | 0.02903 |
| Gene.25297::TRINITY_DN18619_c0_g1::g.25297::m.25297  | Ubiquitin-conjugating enzyme E2-16 kDa                             | 295.049 | 26 | 0.81928 | 0.0047  |
| Gene.25429::TRINITY_DN18623_c2_g16::g.25429::m.25429 | Nucleolar GTP-binding protein 2                                    | 776.163 | 9  | 0.83262 | 0.02578 |
| Gene.25440::TRINITY_DN18623_c2_g18::g.25440::m.25440 | 40S ribosomal protein S13                                          | 242.276 | 30 | 1.57137 | 0.00257 |
| Gene.25444::TRINITY_DN18623_c2_g2::g.25444::m.25444  | Anucleate primary sterigmata protein A                             | 427.172 | 7  | 1.20389 | 0.00173 |
| Gene.25529::TRINITY_DN18625_c0_g14::g.25529::m.25529 | CUE domain-containing protein C354.10                              | 78.9518 | 18 | 0.74448 | 0.01152 |
| Gene.25608::TRINITY_DN18626_c1_g4::g.25608::m.25608  | NPC intracellular cholesterol transporter 1-related protein 1      | 867.455 | 9  | 1.22506 | 0.00701 |
| Gene.25652::TRINITY_DN18627_c0_g19::g.25652::m.25652 | Aldehyde dehydrogenase                                             | 393.66  | 2  | 1.29232 | 0.00682 |
| Gene.25657::TRINITY_DN18627_c0_g20::g.25657::m.25657 | Short-chain dehydrogenase/reductase ATR7                           | 111.309 | 81 | 1.23343 | 0.0151  |
| Gene.25721::TRINITY_DN18628_c3_g5::g.25721::m.25721  | Probable Delta (7)-sterol 5(6)-desaturase                          | 503.056 | 3  | 1.51403 | 0.02284 |
| Gene.25910::TRINITY_DN18633_c3_g16::g.25910::m.25910 | Deoxyribonuclease Tat-D                                            | 254.988 | 2  | 0.77567 | 0.01057 |
| Gene.26051::TRINITY_DN18638_c0_g14::g.26051::m.26051 | Putative serine/threonine-protein phosphatase C22H10.04            | 460.299 | 4  | 0.78678 | 0.00489 |
| Gene.2617::TRINITY_DN12157_c0_g1::g.2617::m.2617     | Aspartyl aminopeptidase                                            | 702.205 | 30 | 0.83293 | 0.00038 |
| Gene.26220::TRINITY_DN18643_c1_g11::g.26220::m.26220 | ATP synthase subunit H, mitochondrial                              | 54.6842 | 36 | 0.76939 | 0.02042 |
| Gene.26310::TRINITY_DN18646_c2_g8::g.26310::m.26310  | Transcription factor SFP1                                          | 152.525 | 4  | 0.77989 | 0.00317 |
| Gene.26317::TRINITY_DN18646_c2_g9::g.26317::m.26317  | Probable inactive nicotinamidase At3g16190                         | 46.2098 | 22 | 1.32648 | 0.00123 |
| Gene.26454::TRINITY_DN18654_c0_g17::g.26454::m.26454 | Small glutamine-rich tetratricopeptide repeat-containing protein 2 | 207.994 | 25 | 0.79051 | 0.00444 |
| Gene.26667::TRINITY_DN18664_c0_g1::g.26667::m.26667  | Ferric/cupric reductase transmembrane component 7                  | 139.428 | 11 | 1.3175  | 0.01799 |
| Gene.26690::TRINITY_DN18664_c0_g19::g.26690::m.26690 | Non-specific lipid-transfer protein (Fragment)                     | 448.358 | 9  | 1.32648 | 0.02921 |
| Gene.26769::TRINITY_DN18665_c1_g6::g.26769::m.26769  | Altered inheritance of mitochondria protein 6 homolog ARB_06966    | 331.643 | 19 | 1.51783 | 0.03495 |
| Gene.27015::TRINITY_DN18671_c6_g7::g.27015::m.27015  | Probable oxygen-dependent coproporphyrinogen-III oxidase           | 327.405 | 56 | 0.7336  | 0.03894 |
| Gene.27281::TRINITY_DN18679_c2_g21::g.27281::m.27281 | LETM1 domain-containing protein mdm28, mitochondrial               | 385.185 | 40 | 0.79563 | 0.02625 |
| Gene.27399::TRINITY_DN18683_c5_g17::g.27399::m.27399 | Cutinase transcription factor 1 alpha                              | 76.2554 | 4  | 0.76678 | 0.02396 |
| Gene.27431::TRINITY_DN18683_c5_g6::g.27431::m.27431  | Morphogenesis-related protein MSB1                                 | 143.665 | 5  | 1.24346 | 0.01609 |
| Gene.2753::TRINITY_DN12228_c0_g1::g.2753::m.2753     | Signaling mucin HKR1                                               | 56.9954 | 1  | 1.96247 | 0.01314 |
| Gene.27548::TRINITY_DN18693_c0_g1::g.27548::m.27548  | Ketoisovalerate reductase BEA2                                     | 353.214 | 4  | 1.2193  | 0.01313 |
| Gene.27586::TRINITY_DN18705_c0_g1::g.27586::m.27586  | N-carbamoylputrescine amidase                                      | 82.8037 | 21 | 2.0633  | 0.02486 |
| Gene.27759::TRINITY_DN18778_c0_g1::g.27759::m.27759  | Mitochondrial import inner membrane translocase subunit tim16      | 216.083 | 70 | 0.66759 | 0.03458 |
| Gene.27817::TRINITY_DN18800_c0_g1::g.27817::m.27817  | Probable trafficking protein particle complex subunit 2            | 126.331 | 18 | 2.861   | 0.00945 |
| Gene.27872::TRINITY_DN18827_c0_g1::g.27872::m.27872  | 2-methoxy-6-polyprenyl-1,4-benzoquinol methylase, mitochondrial    | 283.108 | 34 | 0.7341  | 0.00594 |
| Gene.27994::TRINITY_DN18897_c0_g1::g.27994::m.27994  | Acid phosphatase PHO1                                              | 154.451 | 8  | 1.2363  | 0.01129 |
| Gene.28064::TRINITY_DN1893_c0_g1::g.28064::m.28064   | Mitochondrial respiratory chain complexes assembly protein         | 764.607 | 45 | 0.77725 | 0.02599 |
| Gene.28174::TRINITY_DN19015_c0_g1::g.28174::m.28174  | Short-chain dehydrogenase reductase 3a                             | 71.633  | 31 | 0.75109 | 0.00331 |
| Gene.28452::TRINITY_DN1928_c0_g1::g.28452::m.28452   | Short chain dehydrogenase atnD                                     | 196.052 | 47 | 1.23881 | 0.03664 |
| Gene.28634::TRINITY_DN19377_c0_g1::g.28634::m.28634  | ATP-dependent RNA helicase MSS116, mitochondrial                   | 352.058 | 27 | 0.81623 | 0.00082 |
| Gene.28670::TRINITY_DN19389_c0_g1::g.28670::m.28670  | ATP-dependent RNA helicase mrh4, mitochondrial                     | 729.554 | 31 | 0.76783 | 0.02727 |
| Gene.28724::TRINITY_DN19415_c0_g1::g.28724::m.28724  | Protein priA                                                       | 70.4774 | 5  | 2.88666 | 0.03666 |
| Gene.28736::TRINITY_DN19425_c0_g1::g.28736::m.28736  | Alpha N-terminal protein methyltransferase 1                       | 163.31  | 3  | 1.35386 | 0.00255 |
| Gene.28744::TRINITY_DN19432_c0_g1::g.28744::m.28744  | Pre-mRNA-splicing factor SYF1                                      | 1459.51 | 10 | 1.27704 | 0.03184 |
| Gene.28818::TRINITY_DN19467_c0_g1::g.28818::m.28818  | Plasma alpha-L-fucosidase                                          | 198.749 | 3  | 1.43251 | 0.04929 |
| Gene.28821::TRINITY_DN19469_c0_g1::g.28821::m.28821  | Oxidase FUB9                                                       | 305.834 | 17 | 1.26843 | 0.02801 |

|                                                     |                                                               |         |    |         |         |
|-----------------------------------------------------|---------------------------------------------------------------|---------|----|---------|---------|
| Gene.28834::TRINITY_DN19476_c0_g1::g.28834::m.28834 | Protein FMP25, mitochondrial                                  | 120.553 | 41 | 0.80723 | 0.02333 |
| Gene.28914::TRINITY_DN19516_c0_g1::g.28914::m.28914 | 6-phosphogluconate dehydrogenase, decarboxylating             | 396.356 | 9  | 1.26453 | 0.03721 |
| Gene.28917::TRINITY_DN19521_c0_g1::g.28917::m.28917 | Succinate-semialdehyde dehydrogenase, mitochondrial           | 412.92  | 2  | 0.79319 | 0.00544 |
| Gene.28955::TRINITY_DN19545_c0_g1::g.28955::m.28955 | Hydroxyacyl-thioester dehydratase type 2, mitochondrial       | 82.4185 | 13 | 1.31354 | 0.01068 |
| Gene.2900::TRINITY_DN12282_c0_g3::g.2900::m.2900    | Protein BNI4                                                  | 83.5741 | 3  | 1.46324 | 0.00362 |
| Gene.29072::TRINITY_DN19650_c0_g1::g.29072::m.29072 | NADH-ubiquinone oxidoreductase 12 kDa subunit, mitochondrial  | 178.718 | 42 | 1.45139 | 0.00809 |
| Gene.29175::TRINITY_DN1977_c0_g1::g.29175::m.29175  | Probable nitrilase C965.09                                    | 74.3294 | 33 | 1.31392 | 0.03147 |
| Gene.29243::TRINITY_DN1990_c0_g1::g.29243::m.29243  | DnaJ homolog subfamily C member 7 homolog                     | 325.865 | 31 | 0.73561 | 0.02797 |
| Gene.29258::TRINITY_DN19938_c0_g1::g.29258::m.29258 | Ubiquitin-conjugating enzyme E2 16                            | 120.168 | 6  | 1.37758 | 0.01323 |
| Gene.29373::TRINITY_DN20024_c0_g1::g.29373::m.29373 | Nudix hydrolase 7                                             | 41.9726 | 42 | 0.7991  | 0.02455 |
| Gene.29396::TRINITY_DN20036_c0_g1::g.29396::m.29396 | Neutral ceramidase 2                                          | 501.516 | 4  | 1.2351  | 0.02762 |
| Gene.29467::TRINITY_DN2006_c0_g1::g.29467::m.29467  | UPF0768 protein YBL029C-A                                     | 39.6614 | 6  | 0.67673 | 0.03301 |
| Gene.29625::TRINITY_DN20133_c0_g1::g.29625::m.29625 | Ras-like protein                                              | 385.185 | 70 | 1.30238 | 0.03152 |
| Gene.29694::TRINITY_DN20172_c0_g1::g.29694::m.29694 | Elongator complex protein 2                                   | 560.066 | 3  | 1.28958 | 0.02862 |
| Gene.2978::TRINITY_DN12352_c0_g1::g.2978::m.2978    | Glycerophosphocholine permease, GIT4                          | 259.996 | 11 | 1.75735 | 0.00396 |
| Gene.29832::TRINITY_DN20250_c0_g1::g.29832::m.29832 | 54S ribosomal protein L28, mitochondrial                      | 42.743  | 14 | 0.58228 | 0.01726 |
| Gene.29848::TRINITY_DN20259_c0_g1::g.29848::m.29848 | Tryprostatin B 6-hydroxylase                                  | 316.62  | 4  | 1.65913 | 0.02441 |
| Gene.29876::TRINITY_DN20288_c0_g1::g.29876::m.29876 | Putative agmatinase 1                                         | 533.487 | 19 | 1.58398 | 0.00681 |
| Gene.29987::TRINITY_DN20384_c0_g1::g.29987::m.29987 | Imidazoleglycerol-phosphate dehydratase                       | 398.667 | 36 | 0.75622 | 0.0034  |
| Gene.30027::TRINITY_DN20432_c0_g1::g.30027::m.30027 | Probable proteasome subunit alpha type-6                      | 315.849 | 56 | 0.8226  | 0.00154 |
| Gene.30062::TRINITY_DN20461_c0_g1::g.30062::m.30062 | 54S ribosomal protein L19, mitochondrial                      | 157.918 | 38 | 0.80451 | 0.04828 |
| Gene.30115::TRINITY_DN20520_c0_g1::g.30115::m.30115 | Monoxygenase CPUR_05431                                       | 202.601 | 30 | 1.61097 | 0.02665 |
| Gene.30156::TRINITY_DN20574_c0_g1::g.30156::m.30156 | Cytoplasmic tRNA 2-thiolation protein 2                       | 120.939 | 14 | 1.28175 | 0.00296 |
| Gene.30185::TRINITY_DN20617_c0_g1::g.30185::m.30185 | Uncharacterized oxidoreductase C663.08c                       | 114.005 | 6  | 1.53528 | 0.01423 |
| Gene.30355::TRINITY_DN20867_c0_g1::g.30355::m.30355 | Chromatin structure-remodeling complex subunit, sfh1          | 141.739 | 4  | 1.33463 | 0.03126 |
| Gene.30439::TRINITY_DN20899_c0_g1::g.30439::m.30439 | Phospholipid-transporting ATPase DNF1                         | 1413.67 | 6  | 1.28311 | 0.01049 |
| Gene.30587::TRINITY_DN20943_c0_g1::g.30587::m.30587 | 54S ribosomal protein L36, mitochondrial                      | 55.0694 | 20 | 0.79802 | 0.01928 |
| Gene.30618::TRINITY_DN20955_c0_g1::g.30618::m.30618 | Mitochondrial zinc maintenance protein 1, mitochondrial       | 129.413 | 28 | 0.72534 | 0.00514 |
| Gene.30640::TRINITY_DN20963_c0_g1::g.30640::m.30640 | Uncharacterized protein C23C11.06c                            | 270.396 | 9  | 1.47975 | 0.03452 |
| Gene.30648::TRINITY_DN20966_c0_g1::g.30648::m.30648 | Uncharacterized protein C32A11.02c                            | 310.071 | 29 | 1.54453 | 0.01059 |
| Gene.30686::TRINITY_DN20986_c0_g1::g.30686::m.30686 | Uncharacterized protein C16G5.07c                             | 372.474 | 59 | 0.75872 | 0.03873 |
| Gene.30763::TRINITY_DN21028_c0_g1::g.30763::m.30763 | FAD-linked oxidoreductase ZEB1                                | 531.946 | 4  | 1.85987 | 0.04909 |
| Gene.30836::TRINITY_DN21073_c0_g1::g.30836::m.30836 | Calcium channel YVC1                                          | 450.284 | 6  | 1.25188 | 0.01931 |
| Gene.30845::TRINITY_DN21077_c0_g1::g.30845::m.30845 | Acetyl-coenzyme A transferase nodX                            | 196.823 | 18 | 1.54669 | 0.00857 |
| Gene.30971::TRINITY_DN21143_c0_g1::g.30971::m.30971 | Pepsin B                                                      | 43.8986 | 2  | 1.7688  | 0.01787 |
| Gene.31032::TRINITY_DN21177_c0_g1::g.31032::m.31032 | Vacuolar membrane protease                                    | 995.342 | 10 | 1.42188 | 0.00296 |
| Gene.31097::TRINITY_DN21233_c0_g1::g.31097::m.31097 | Mitochondrial import inner membrane translocase subunit tim44 | 327.02  | 53 | 0.7336  | 0.02742 |
| Gene.31334::TRINITY_DN21478_c0_g1::g.31334::m.31334 | 40S ribosomal protein S11-A                                   | 221.861 | 16 | 4.28546 | 0.01486 |
| Gene.31570::TRINITY_DN21748_c0_g1::g.31570::m.31570 | Putative NADPH dehydrogenase C23G7.10c                        | 309.301 | 2  | 1.38135 | 0.0324  |
| Gene.31578::TRINITY_DN21751_c0_g1::g.31578::m.31578 | Solute carrier family 25 member 40                            | 233.417 | 3  | 0.79319 | 0.00465 |
| Gene.31676::TRINITY_DN21789_c0_g1::g.31676::m.31676 | Probable secreted lipase ARB_00047                            | 212.616 | 3  | 1.75149 | 0.00321 |
| Gene.31752::TRINITY_DN21824_c0_g1::g.31752::m.31752 | Translation initiation factor IF-2, mitochondrial             | 489.96  | 12 | 0.82648 | 0.02754 |



|                                                     |                                                                                       |         |    |         |         |
|-----------------------------------------------------|---------------------------------------------------------------------------------------|---------|----|---------|---------|
| Gene.31881::TRINITY_DN21893_c0_g1::g.31881::m.31881 | Amino-acid permease 2                                                                 | 586.645 | 3  | 1.63968 | 0.03315 |
| Gene.31888::TRINITY_DN21897_c0_g1::g.31888::m.31888 | Phytoene desaturase                                                                   | 642.114 | 24 | 1.84091 | 0.00026 |
| Gene.31951::TRINITY_DN21926_c0_g1::g.31951::m.31951 | Mitochondrial carnitine carrier                                                       | 273.863 | 23 | 1.34467 | 0.0301  |
| Gene.32028::TRINITY_DN21962_c0_g1::g.32028::m.32028 | 3-dehydroshikimate dehydratase                                                        | 150.599 | 9  | 2.96367 | 0.0111  |
| Gene.32091::TRINITY_DN22004_c0_g1::g.32091::m.32091 | Methyltransferase-like protein 7B                                                     | 77.7962 | 17 | 1.26548 | 0.02139 |
| Gene.32127::TRINITY_DN22021_c0_g1::g.32127::m.32127 | Probable 54S ribosomal protein L32, mitochondrial                                     | 77.0258 | 7  | 1.71985 | 0.02186 |
| Gene.32132::TRINITY_DN22024_c0_g1::g.32132::m.32132 | Pre-mRNA-splicing factor sap61                                                        | 416.387 | 14 | 1.29008 | 0.00052 |
| Gene.32242::TRINITY_DN22121_c0_g1::g.32242::m.32242 | Imidazole glycerol phosphate synthase hisHF                                           | 803.127 | 30 | 0.78253 | 0.01417 |
| Gene.32261::TRINITY_DN22133_c0_g1::g.32261::m.32261 | Uncharacterized protein tam6, mitochondrial                                           | 43.8986 | 6  | 0.82871 | 0.02084 |
| Gene.32263::TRINITY_DN22137_c0_g1::g.32263::m.32263 | Glycerol-3-phosphate dehydrogenase [NAD(+)]                                           | 639.032 | 18 | 0.82588 | 0.00354 |
| Gene.32332::TRINITY_DN22203_c0_g1::g.32332::m.32332 | Iron-sulfur assembly protein 2                                                        | 80.8777 | 8  | 0.72662 | 0.0301  |
| Gene.32520::TRINITY_DN22558_c0_g1::g.32520::m.32520 | Uncharacterized protein C1840.09                                                      | 183.341 | 41 | 0.7316  | 0.02021 |
| Gene.32548::TRINITY_DN22567_c0_g1::g.32548::m.32548 | Vacuolar morphogenesis protein 7 homolog                                              | 127.102 | 22 | 1.33775 | 0.03618 |
| Gene.32551::TRINITY_DN22569_c0_g1::g.32551::m.32551 | Protein BFR2                                                                          | 431.409 | 7  | 1.40152 | 0.00592 |
| Gene.32564::TRINITY_DN22578_c0_g1::g.32564::m.32564 | Cytochrome c oxidase polypeptide 5, mitochondrial                                     | 114.775 | 11 | 2.15126 | 0.0185  |
| Gene.32600::TRINITY_DN22595_c0_g1::g.32600::m.32600 | Probable lysosomal cobalamin transporter                                              | 808.135 | 5  | 1.23214 | 0.01591 |
| Gene.32614::TRINITY_DN22599_c0_g1::g.32614::m.32614 | Uncharacterized CDP-alcohol phosphatidyltransferase class-I family protein C22A12.08c | 239.965 | 6  | 1.59516 | 0.02438 |
| Gene.32678::TRINITY_DN22626_c0_g1::g.32678::m.32678 | Lysine--tRNA ligase, mitochondrial                                                    | 308.531 | 15 | 0.79319 | 0.00868 |
| Gene.3268::TRINITY_DN12468_c0_g1::g.3268::m.3268    | Retrograde regulation protein 2                                                       | 231.106 | 5  | 1.2531  | 0.01833 |
| Gene.32764::TRINITY_DN22658_c0_g1::g.32764::m.32764 | Putative D-lactate dehydrogenase C713.03, mitochondrial                               | 637.876 | 34 | 0.81214 | 0.03628 |
| Gene.32848::TRINITY_DN22702_c0_g1::g.32848::m.32848 | Mitochondrial amidoxime-reducing component 1                                          | 72.4034 | 3  | 1.3706  | 0.03866 |
| Gene.32888::TRINITY_DN22717_c0_g1::g.32888::m.32888 | Vacuolar transporter chaperone 3                                                      | 455.292 | 28 | 1.3175  | 0.01562 |
| Gene.32898::TRINITY_DN22719_c0_g1::g.32898::m.32898 | AFG1-like ATPase                                                                      | 142.124 | 4  | 1.28002 | 0.02697 |
| Gene.32918::TRINITY_DN22726_c0_g1::g.32918::m.32918 | eEF1A lysine and N-terminal methyltransferase                                         | 58.5362 | 3  | 1.27407 | 0.00222 |
| Gene.33030::TRINITY_DN22773_c0_g1::g.33030::m.33030 | Cytochrome P450 monooxygenase paxP                                                    | 145.591 | 4  | 1.73179 | 0.02279 |
| Gene.33036::TRINITY_DN22777_c0_g1::g.33036::m.33036 | Copper amine oxidase 1                                                                | 444.121 | 3  | 0.73611 | 0.00166 |
| Gene.33220::TRINITY_DN22865_c0_g1::g.33220::m.33220 | Mitochondrial import inner membrane translocase subunit TIM50                         | 603.208 | 34 | 0.73992 | 0.04134 |
| Gene.33361::TRINITY_DN22949_c0_g1::g.33361::m.33361 | 54S ribosomal protein L17, mitochondrial                                              | 127.102 | 29 | 0.7508  | 0.01443 |
| Gene.33380::TRINITY_DN22965_c0_g1::g.33380::m.33380 | GTPase-activating protein GYP5                                                        | 257.684 | 1  | 0.66113 | 0.01532 |
| Gene.33429::TRINITY_DN229_c0_g1::g.33429::m.33429   | Putative copper transporter crmD                                                      | 43.8986 | 5  | 1.52419 | 0.04004 |
| Gene.33434::TRINITY_DN23007_c0_g1::g.33434::m.33434 | Microfibrillar-associated protein 1                                                   | 112.849 | 2  | 1.57689 | 0.01842 |
| Gene.33451::TRINITY_DN23016_c0_g1::g.33451::m.33451 | 54S ribosomal protein L11, mitochondrial                                              | 64.3142 | 34 | 0.76574 | 0.00504 |
| Gene.33483::TRINITY_DN23034_c0_g1::g.33483::m.33483 | HD domain-containing protein C4G3.17                                                  | 141.739 | 22 | 1.26548 | 0.02747 |
| Gene.33551::TRINITY_DN23102_c0_g1::g.33551::m.33551 | Probable cytosolic iron-sulfur protein assembly protein 1                             | 530.02  | 5  | 0.80505 | 0.00494 |
| Gene.33576::TRINITY_DN2311_c0_g2::g.33576::m.33576  | Agroclavine dehydrogenase                                                             | 234.187 | 5  | 1.26672 | 0.04222 |
| Gene.33630::TRINITY_DN23182_c0_g1::g.33630::m.33630 | 3-hydroxyacyl-CoA dehydrogenase type-2                                                | 56.9954 | 26 | 1.49273 | 0.02049 |
| Gene.33667::TRINITY_DN2322_c0_g1::g.33667::m.33667  | FAD-dependent monooxygenase sorC                                                      | 180.644 | 8  | 1.76243 | 0.04917 |
| Gene.33762::TRINITY_DN23337_c0_g1::g.33762::m.33762 | Putative redox protein fmp46, mitochondrial                                           | 56.225  | 53 | 0.706   | 0.0366  |
| Gene.33861::TRINITY_DN2367_c0_g1::g.33861::m.33861  | Uncharacterized RNA-binding protein C1861.04c                                         | 298.13  | 14 | 1.41198 | 0.00796 |
| Gene.33873::TRINITY_DN2371_c0_g1::g.33873::m.33873  | U3 small nucleolar RNA-associated protein 15                                          | 345.51  | 6  | 0.72989 | 0.02025 |
| Gene.33901::TRINITY_DN2396_c0_g1::g.33901::m.33901  | Probable vacuolar protease A                                                          | 90.8929 | 8  | 1.28746 | 0.03967 |



|                                                    |                                                                 |         |    |         |         |
|----------------------------------------------------|-----------------------------------------------------------------|---------|----|---------|---------|
| Gene.33920::TRINITY_DN2411_c0_g1::g.33920::m.33920 | Mitochondrial inner membrane protein OXA1L                      | 108.612 | 16 | 0.77883 | 0.01179 |
| Gene.33985::TRINITY_DN2457_c0_g1::g.33985::m.33985 | Syntaxin-22                                                     | 103.219 | 26 | 1.27311 | 0.00591 |
| Gene.34003::TRINITY_DN2480_c0_g1::g.34003::m.34003 | BSD domain-containing protein C22A12.14c                        | 85.8853 | 39 | 0.77433 | 0.00108 |
| Gene.34287::TRINITY_DN2699_c0_g1::g.34287::m.34287 | Short chain dehydrogenase mpl6                                  | 143.28  | 46 | 2.38792 | 0.00029 |
| Gene.3431::TRINITY_DN12520_c0_g1::g.3431::m.3431   | Translation initiation factor eIF-2B subunit gamma              | 120.553 | 15 | 0.81159 | 0.03743 |
| Gene.34314::TRINITY_DN2716_c0_g1::g.34314::m.34314 | Citrinin biosynthesis transcriptional activator ctnR            | 165.236 | 1  | 1.2363  | 0.01511 |
| Gene.3444::TRINITY_DN12530_c0_g3::g.3444::m.3444   | Dihydropyrimidinase                                             | 399.053 | 22 | 1.48139 | 0.01219 |
| Gene.34497::TRINITY_DN2901_c0_g1::g.34497::m.34497 | Trafficking protein particle complex subunit 11                 | 77.7962 | 2  | 0.77567 | 0.03019 |
| Gene.34536::TRINITY_DN295_c0_g1::g.34536::m.34536  | Protein Rf1, mitochondrial                                      | 70.8626 | 1  | 0.82704 | 0.00389 |
| Gene.34606::TRINITY_DN3026_c0_g1::g.34606::m.34606 | 5-aminolevulinate synthase, erythroid-specific, mitochondrial   | 68.5514 | 7  | 1.44698 | 0.00095 |
| Gene.34730::TRINITY_DN3158_c0_g1::g.34730::m.34730 | Cytochrome P450 monooxygenase sdnH                              | 465.692 | 9  | 2.05499 | 0.01929 |
| Gene.34777::TRINITY_DN31_c0_g1::g.34777::m.34777   | Dehydrogenase patE                                              | 555.058 | 31 | 1.74303 | 0.00458 |
| Gene.34928::TRINITY_DN3372_c0_g1::g.34928::m.34928 | Homoserine dehydrogenase                                        | 411.764 | 75 | 0.8105  | 0.01057 |
| Gene.35013::TRINITY_DN3498_c0_g1::g.35013::m.35013 | Zerumbone synthase                                              | 145.976 | 18 | 1.50522 | 0.01882 |
| Gene.35141::TRINITY_DN3598_c0_g2::g.35141::m.35141 | Elongation factor G, mitochondrial                              | 1267.68 | 39 | 0.78808 | 0.00711 |
| Gene.35235::TRINITY_DN3683_c0_g1::g.35235::m.35235 | RNA-capping enzyme subunit alpha                                | 255.758 | 4  | 1.20426 | 0.04758 |
| Gene.35243::TRINITY_DN368_c0_g1::g.35243::m.35243  | DNA-directed RNA polymerases I, II, and III subunit RPABC2      | 148.288 | 5  | 0.65062 | 0.01932 |
| Gene.35256::TRINITY_DN3693_c0_g1::g.35256::m.35256 | Outer spore wall protein RRT8                                   | 43.8986 | 3  | 1.55102 | 0.02058 |
| Gene.35323::TRINITY_DN3764_c0_g1::g.35323::m.35323 | Ubiquinone biosynthesis protein, coq9                           | 134.42  | 12 | 0.75007 | 0.02403 |
| Gene.35461::TRINITY_DN38_c0_g1::g.35461::m.35461   | AB hydrolase superfamily protein C4A8.06c                       | 57.3806 | 11 | 1.35849 | 0.01832 |
| Gene.356::TRINITY_DN10547_c0_g1::g.356::m.356      | Mitochondrial phosphate carrier protein 2                       | 236.113 | 45 | 1.53915 | 0.03053 |
| Gene.35605::TRINITY_DN4020_c0_g1::g.35605::m.35605 | GPN-loop GTPase 1                                               | 409.068 | 14 | 0.73561 | 0.01049 |
| Gene.35609::TRINITY_DN4020_c0_g2::g.35609::m.35609 | DNA-directed RNA polymerases I, II, and III subunit RPABC4      | 77.411  | 21 | 0.69895 | 0.00207 |
| Gene.35664::TRINITY_DN406_c0_g1::g.35664::m.35664  | Glucose-6-phosphate isomerase                                   | 149.828 | 6  | 1.79367 | 0.03087 |
| Gene.35806::TRINITY_DN4185_c0_g1::g.35806::m.35806 | Aromatic amino acid aminotransferase C56E4.03                   | 251.521 | 11 | 1.24551 | 0.00253 |
| Gene.35818::TRINITY_DN4197_c0_g1::g.35818::m.35818 | Probable exocyst complex component sec8                         | 1415.59 | 9  | 1.23297 | 0.01422 |
| Gene.35928::TRINITY_DN429_c0_g1::g.35928::m.35928  | Uncharacterized leucine-rich repeat-containing protein C926.06c | 243.432 | 1  | 1.40577 | 0.00903 |
| Gene.35936::TRINITY_DN4303_c0_g1::g.35936::m.35936 | Sexual differentiation process protein isp4                     | 467.618 | 1  | 1.8851  | 0.02691 |
| Gene.35941::TRINITY_DN4305_c0_g1::g.35941::m.35941 | Iron-sulfur assembly protein 1                                  | 141.739 | 4  | 0.71478 | 5.7E-05 |
| Gene.36053::TRINITY_DN4357_c0_g1::g.36053::m.36053 | Serine/threonine-protein kinase KIN28                           | 290.426 | 4  | 0.81573 | 0.02647 |
| Gene.36240::TRINITY_DN4442_c0_g1::g.36240::m.36240 | Uncharacterized protein C3B8.09                                 | 239.195 | 4  | 1.48798 | 0.03177 |
| Gene.3639::TRINITY_DN12608_c0_g3::g.3639::m.3639   | Exosome complex component CSL4                                  | 155.992 | 19 | 1.2805  | 0.0053  |
| Gene.36401::TRINITY_DN450_c0_g2::g.36401::m.36401  | Replication factor A protein 3                                  | 67.781  | 35 | 0.76753 | 0.01444 |
| Gene.36449::TRINITY_DN4526_c0_g1::g.36449::m.36449 | Dedicator of cytokinesis protein 1                              | 338.576 | 3  | 1.35942 | 0.00126 |
| Gene.36456::TRINITY_DN4529_c0_g1::g.36456::m.36456 | DNA mismatch repair protein msh-2                               | 1655.19 | 2  | 1.90508 | 0.046   |
| Gene.36494::TRINITY_DN4550_c0_g1::g.36494::m.36494 | Probable proteasome subunit alpha type-2                        | 474.167 | 36 | 0.82785 | 0.00662 |
| Gene.36611::TRINITY_DN4610_c0_g1::g.36611::m.36611 | Septum-promoting GTP-binding protein 1                          | 348.977 | 18 | 1.6455  | 0.00568 |
| Gene.36616::TRINITY_DN4611_c0_g1::g.36616::m.36616 | Trafficking protein particle complex subunit BET3               | 222.246 | 12 | 0.76419 | 0.00107 |
| Gene.36618::TRINITY_DN4612_c0_g1::g.36618::m.36618 | Uncharacterized boIA-like protein C4B3.11c                      | 84.7297 | 6  | 0.79994 | 0.01144 |
| Gene.36693::TRINITY_DN4636_c0_g2::g.36693::m.36693 | Polyadenylation factor subunit 2                                | 753.821 | 3  | 1.35756 | 0.0022  |
| Gene.36763::TRINITY_DN4656_c0_g2::g.36763::m.36763 | tRNA-specific adenosine deaminase subunit tad3                  | 81.2629 | 5  | 1.41935 | 0.03064 |
| Gene.36832::TRINITY_DN4684_c0_g1::g.36832::m.36832 | Inner nuclear membrane protein SRC1                             | 89.3521 | 18 | 1.22058 | 0.00592 |

|                                                    |                                                                 |         |    |         |         |
|----------------------------------------------------|-----------------------------------------------------------------|---------|----|---------|---------|
| Gene.36922::TRINITY_DN4728_c0_g2::g.36922::m.36922 | Phosphatidylinositol 4-phosphate 5-kinase its3                  | 559.681 | 3  | 0.7549  | 0.02121 |
| Gene.36929::TRINITY_DN4729_c0_g1::g.36929::m.36929 | Transforming growth factor-beta receptor-associated protein 1   | 100.523 | 1  | 1.28137 | 0.01534 |
| Gene.36942::TRINITY_DN4733_c0_g1::g.36942::m.36942 | Vacuolar transporter chaperone 1                                | 175.252 | 15 | 1.21685 | 0.0421  |
| Gene.36984::TRINITY_DN4756_c0_g1::g.36984::m.36984 | SEH-associated protein 4                                        | 223.402 | 2  | 1.34703 | 0.00795 |
| Gene.37026::TRINITY_DN4780_c0_g1::g.37026::m.37026 | Lariat debranching enzyme                                       | 335.109 | 2  | 1.20588 | 0.02347 |
| Gene.37064::TRINITY_DN4810_c0_g1::g.37064::m.37064 | Uncharacterized methyltransferase C70.08c                       | 70.4774 | 49 | 1.41643 | 0.03485 |
| Gene.3726::TRINITY_DN12682_c0_g2::g.3726::m.3726   | ADIPOR-like receptor IZH2                                       | 165.236 | 3  | 0.8018  | 0.00096 |
| Gene.37269::TRINITY_DN5092_c0_g1::g.37269::m.37269 | Ribose-phosphate pyrophosphokinase 5                            | 389.808 | 20 | 1.21031 | 0.00194 |
| Gene.3744::TRINITY_DN12690_c0_g1::g.3744::m.3744   | WW domain-containing oxidoreductase                             | 56.9954 | 18 | 1.45943 | 0.01585 |
| Gene.37487::TRINITY_DN5320_c0_g1::g.37487::m.37487 | WHI2-like protein P4H10.16c                                     | 162.925 | 26 | 1.44458 | 0.00266 |
| Gene.37530::TRINITY_DN5351_c0_g1::g.37530::m.37530 | Cytochrome P450 52A13                                           | 296.204 | 14 | 1.51889 | 0.02507 |
| Gene.37726::TRINITY_DN5593_c0_g2::g.37726::m.37726 | Dehydrololichyl diphosphate synthase complex subunit NUS1       | 176.022 | 8  | 1.21685 | 0.01111 |
| Gene.37948::TRINITY_DN5805_c0_g2::g.37948::m.37948 | Uncharacterized protein C9E9.15                                 | 115.931 | 9  | 0.71009 | 0.0249  |
| Gene.37993::TRINITY_DN5827_c0_g1::g.37993::m.37993 | Phosphatidylglycerol phospholipase C                            | 113.235 | 16 | 0.67832 | 0.01385 |
| Gene.3810::TRINITY_DN12739_c0_g2::g.3810::m.3810   | Uncharacterized protein YLL056C                                 | 63.929  | 45 | 1.33372 | 0.02965 |
| Gene.38197::TRINITY_DN596_c0_g1::g.38197::m.38197  | Phenylalanine--tRNA ligase, mitochondrial                       | 272.322 | 29 | 0.73611 | 0.00942 |
| Gene.38273::TRINITY_DN6048_c0_g1::g.38273::m.38273 | 26S proteasome non-ATPase regulatory subunit 9                  | 141.739 | 16 | 0.80807 | 0.03237 |
| Gene.38307::TRINITY_DN6085_c0_g1::g.38307::m.38307 | All-trans-retinol dehydrogenase [NAD(+)] ADH1B                  | 151.754 | 34 | 1.24972 | 0.01105 |
| Gene.38764::TRINITY_DN6515_c0_g2::g.38764::m.38764 | Acetate permease A                                              | 279.256 | 9  | 1.7894  | 0.03858 |
| Gene.3881::TRINITY_DN12771_c0_g1::g.3881::m.3881   | V-type proton ATPase 16 kDa proteolipid subunit                 | 260.766 | 12 | 1.46264 | 0.0005  |
| Gene.38843::TRINITY_DN6555_c0_g1::g.38843::m.38843 | Kynureninase 2                                                  | 666.381 | 4  | 0.75879 | 0.00466 |
| Gene.39008::TRINITY_DN6665_c0_g2::g.39008::m.39008 | Solute carrier family 28 member 3                               | 281.182 | 2  | 1.46163 | 0.04352 |
| Gene.3904::TRINITY_DN12783_c0_g3::g.3904::m.3904   | Putative arrestin-related trafficking adapter C2D10.04          | 265.774 | 4  | 1.32558 | 0.00275 |
| Gene.39087::TRINITY_DN6726_c0_g1::g.39087::m.39087 | Putative mitochondrial carnitine O-acetyltransferase            | 516.924 | 8  | 1.31622 | 0.01688 |
| Gene.39179::TRINITY_DN67_c0_g1::g.39179::m.39179   | Coactosin                                                       | 106.686 | 42 | 0.82315 | 0.00414 |
| Gene.3927::TRINITY_DN12792_c0_g1::g.3927::m.3927   | Mitochondrial import inner membrane translocase subunit tim22   | 234.958 | 24 | 0.41878 | 0.01354 |
| Gene.39288::TRINITY_DN6902_c0_g1::g.39288::m.39288 | Putative nucleosome assembly protein C36B7.08c                  | 85.1149 | 20 | 0.82562 | 0.0462  |
| Gene.39374::TRINITY_DN7016_c0_g1::g.39374::m.39374 | Acetyl-CoA--deacetylcephalosporin C acetyltransferase           | 61.6178 | 7  | 1.39561 | 0.00839 |
| Gene.3939::TRINITY_DN1279_c0_g2::g.3939::m.3939    | Acetamidase                                                     | 165.622 | 17 | 1.25649 | 0.02072 |
| Gene.39422::TRINITY_DN7076_c0_g1::g.39422::m.39422 | ATP synthase subunit epsilon, mitochondrial                     | 44.669  | 22 | 0.81984 | 0.02458 |
| Gene.39539::TRINITY_DN717_c0_g1::g.39539::m.39539  | Sphingosine N-acyltransferase-like protein FUM18                | 358.607 | 1  | 1.25602 | 0.03607 |
| Gene.39616::TRINITY_DN7212_c0_g1::g.39616::m.39616 | Choline monooxygenase, chloroplastic                            | 130.568 | 2  | 1.8342  | 0.03263 |
| Gene.39624::TRINITY_DN7218_c0_g3::g.39624::m.39624 | Carboxyvinyl-carboxyphosphonate phosphorylmutase, chloroplastic | 157.918 | 19 | 1.29747 | 0.00833 |
| Gene.39704::TRINITY_DN7262_c0_g1::g.39704::m.39704 | Protein SIP5                                                    | 499.975 | 6  | 1.27752 | 0.01059 |
| Gene.39760::TRINITY_DN7290_c0_g1::g.39760::m.39760 | Mitochondrial ATPase complex subunit ATP10                      | 97.4413 | 19 | 0.72068 | 0.02554 |
| Gene.39769::TRINITY_DN7299_c0_g1::g.39769::m.39769 | Trans-enoyl reductase fsdC                                      | 132.109 | 3  | 1.38434 | 0.01649 |
| Gene.39801::TRINITY_DN7350_c0_g2::g.39801::m.39801 | Acetyl-CoA acetyltransferase, mitochondrial                     | 172.94  | 5  | 0.72911 | 0.03328 |
| Gene.39819::TRINITY_DN7374_c0_g2::g.39819::m.39819 | Alpha-L-arabinofuranosidase C                                   | 583.948 | 3  | 2.30943 | 0.04115 |
| Gene.39901::TRINITY_DN7465_c0_g2::g.39901::m.39901 | pH-response regulator protein palA/RIM20                        | 1119.76 | 10 | 1.20913 | 0.00073 |
| Gene.39907::TRINITY_DN747_c0_g1::g.39907::m.39907  | Cytochrome P450 monooxygenase aclL                              | 370.163 | 3  | 1.47219 | 0.01285 |
| Gene.40007::TRINITY_DN75_c0_g1::g.40007::m.40007   | Uncharacterized membrane protein C24H6.13                       | 395.586 | 3  | 1.21848 | 0.02898 |
| Gene.40045::TRINITY_DN7629_c0_g1::g.40045::m.40045 | Uncharacterized membrane protein YJR124C                        | 218.779 | 10 | 1.55168 | 0.01086 |

|                                                    |                                                               |         |    |         |         |
|----------------------------------------------------|---------------------------------------------------------------|---------|----|---------|---------|
| Gene.40282::TRINITY_DN7893_c1_g1::g.40282::m.40282 | Probable U6 snRNA-associated Sm-like protein LSm3             | 110.538 | 14 | 0.80397 | 0.01806 |
| Gene.40317::TRINITY_DN7917_c0_g2::g.40317::m.40317 | Pre-rRNA-processing protein rix1                              | 45.0542 | 10 | 0.8276  | 0.02956 |
| Gene.40435::TRINITY_DN8040_c0_g1::g.40435::m.40435 | Short-chain dehydrogenase/reductase tropE                     | 274.633 | 34 | 1.9513  | 0.00662 |
| Gene.40471::TRINITY_DN8072_c0_g1::g.40471::m.40471 | NADH dehydrogenase [ubiquinone] iron-sulfur protein 5-B       | 55.0694 | 44 | 1.57843 | 0.04246 |
| Gene.40536::TRINITY_DN8105_c0_g1::g.40536::m.40536 | tRNA-dihydrouridine(20) synthase [NAD(P)+]                    | 244.973 | 4  | 1.21402 | 0.00079 |
| Gene.40547::TRINITY_DN8111_c0_g1::g.40547::m.40547 | NO-methyltransferase cnsE                                     | 99.3673 | 9  | 1.24972 | 0.03908 |
| Gene.40636::TRINITY_DN8146_c0_g1::g.40636::m.40636 | Dolichol kinase sec59                                         | 141.739 | 1  | 1.25442 | 0.01945 |
| Gene.40734::TRINITY_DN8212_c0_g1::g.40734::m.40734 | Microtubule integrity protein mal3                            | 227.254 | 60 | 0.73489 | 0.00921 |
| Gene.40760::TRINITY_DN8225_c0_g1::g.40760::m.40760 | Subtilisin-like proteinase Spm1                               | 589.726 | 30 | 1.20345 | 0.00331 |
| Gene.40854::TRINITY_DN8256_c0_g1::g.40854::m.40854 | Putative lipase YOR059C                                       | 51.6026 | 6  | 1.94551 | 0.00886 |
| Gene.41031::TRINITY_DN8315_c0_g2::g.41031::m.41031 | Carboxypeptidase S1 homolog A                                 | 593.964 | 7  | 1.4818  | 0.01807 |
| Gene.4115::TRINITY_DN12879_c0_g5::g.4115::m.4115   | Phytanoyl-CoA dioxygenase domain-containing protein 1 homolog | 213.386 | 21 | 1.29446 | 0.00012 |
| Gene.4122::TRINITY_DN12882_c0_g1::g.4122::m.4122   | 10 kDa heat shock protein, mitochondrial                      | 128.257 | 11 | 0.62646 | 0.04336 |
| Gene.41268::TRINITY_DN8412_c0_g2::g.41268::m.41268 | Bax inhibitor 1                                               | 179.489 | 5  | 1.36274 | 0.01528 |
| Gene.4136::TRINITY_DN12891_c0_g1::g.4136::m.4136   | Aurofusarin biosynthesis cluster protein S                    | 141.739 | 24 | 1.457   | 0.04935 |
| Gene.41424::TRINITY_DN8547_c0_g1::g.41424::m.41424 | Translation machinery-associated protein 46                   | 267.314 | 22 | 0.83293 | 0.02048 |
| Gene.41452::TRINITY_DN8568_c0_g1::g.41452::m.41452 | Probable very-long-chain (3R)-3-hydroxyacyl-CoA dehydratase   | 145.206 | 3  | 1.39672 | 0.03577 |
| Gene.41478::TRINITY_DN8579_c0_g1::g.41478::m.41478 | AP-3 complex subunit beta-2                                   | 418.698 | 7  | 1.36794 | 0.00072 |
| Gene.41483::TRINITY_DN8580_c0_g1::g.41483::m.41483 | Copper amine oxidase 1                                        | 823.543 | 21 | 1.27187 | 0.00281 |
| Gene.41514::TRINITY_DN8604_c0_g2::g.41514::m.41514 | Acyl-CoA synthetase FUM16                                     | 712.22  | 12 | 1.26159 | 0.00916 |
| Gene.41602::TRINITY_DN8663_c0_g1::g.41602::m.41602 | 26S proteasome regulatory subunit rpn11                       | 455.292 | 38 | 0.72414 | 0.00118 |
| Gene.41644::TRINITY_DN8688_c0_g2::g.41644::m.41644 | DNA-directed RNA polymerase III subunit rpc9                  | 54.6842 | 19 | 0.80204 | 0.02398 |
| Gene.41810::TRINITY_DN8831_c0_g1::g.41810::m.41810 | Catalase-1                                                    | 1064.29 | 26 | 1.45399 | 0.02659 |
| Gene.4184::TRINITY_DN12913_c0_g2::g.4184::m.4184   | Acyl-CoA dehydrogenase AFT10-1                                | 356.681 | 12 | 1.34558 | 0.03338 |
| Gene.41848::TRINITY_DN88_c0_g1::g.41848::m.41848   | DnaJ homolog 1, mitochondrial                                 | 498.049 | 24 | 0.65472 | 0.01413 |
| Gene.41898::TRINITY_DN8960_c0_g1::g.41898::m.41898 | Methionine aminopeptidase 1                                   | 447.203 | 10 | 1.23501 | 0.01382 |
| Gene.41997::TRINITY_DN905_c0_g1::g.41997::m.41997  | 2-aminomuconic semialdehyde dehydrogenase                     | 425.246 | 7  | 1.42482 | 0.02231 |
| Gene.42051::TRINITY_DN9119_c0_g1::g.42051::m.42051 | Protein CASP                                                  | 252.292 | 15 | 1.24551 | 0.00299 |
| Gene.42102::TRINITY_DN9158_c0_g1::g.42102::m.42102 | Probable transcriptional regulator ycf27                      | 85.1149 | 66 | 2.67586 | 0.04451 |
| Gene.42188::TRINITY_DN9248_c0_g1::g.42188::m.42188 | Methylenetetrahydrofolate dehydrogenase [NAD(+)]              | 375.17  | 38 | 0.78731 | 0.04149 |
| Gene.42189::TRINITY_DN9248_c0_g2::g.42189::m.42189 | Signal peptidase complex subunit SPC2                         | 69.707  | 17 | 1.21484 | 0.0085  |
| Gene.42379::TRINITY_DN9404_c1_g2::g.42379::m.42379 | Methyltransferase trt5                                        | 84.7297 | 20 | 1.25056 | 0.02366 |
| Gene.42769::TRINITY_DN9682_c0_g2::g.42769::m.42769 | Bifunctional lycopene cyclase/phytoene synthase               | 548.51  | 16 | 1.41198 | 0.01422 |
| Gene.42789::TRINITY_DN9695_c0_g1::g.42789::m.42789 | ABC multidrug transporter mdr1                                | 1712.2  | 11 | 2.33148 | 9.1E-06 |
| Gene.42884::TRINITY_DN9762_c0_g2::g.42884::m.42884 | HD domain-containing protein C4G3.17                          | 172.555 | 28 | 0.81354 | 0.01495 |
| Gene.42922::TRINITY_DN9783_c0_g1::g.42922::m.42922 | Iron-sulfur clusters transporter ATM1, mitochondrial          | 387.497 | 7  | 1.21529 | 0.02467 |
| Gene.42927::TRINITY_DN9789_c0_g1::g.42927::m.42927 | Adrenodoxin homolog, mitochondrial                            | 168.318 | 6  | 0.68473 | 0.04773 |
| Gene.42943::TRINITY_DN9792_c0_g1::g.42943::m.42943 | Hydrolase tropI                                               | 192.971 | 32 | 1.25649 | 0.00151 |
| Gene.4298::TRINITY_DN12969_c0_g1::g.4298::m.4298   | ATP-dependent RNA helicase DBP8                               | 776.548 | 7  | 1.38379 | 0.01127 |
| Gene.43004::TRINITY_DN9842_c0_g1::g.43004::m.43004 | Protein sum2                                                  | 132.88  | 13 | 0.77335 | 0.0049  |
| Gene.43085::TRINITY_DN9944_c0_g1::g.43085::m.43085 | Tyrosine--tRNA ligase, cytoplasmic                            | 160.229 | 7  | 0.81184 | 0.04814 |
| Gene.4324::TRINITY_DN12984_c0_g1::g.4324::m.4324   | Tubulin-specific chaperone D                                  | 70.8626 | 8  | 1.28871 | 0.01281 |

|                                                  |                                                               |         |    |         |         |
|--------------------------------------------------|---------------------------------------------------------------|---------|----|---------|---------|
| Gene.4349::TRINITY_DN12996_c0_g2::g.4349::m.4349 | Uncharacterized oxidoreductase C162.03                        | 157.147 | 5  | 1.37021 | 0.01715 |
| Gene.4455::TRINITY_DN13039_c0_g2::g.4455::m.4455 | Probable NADH dehydrogenase                                   | 304.294 | 14 | 0.69827 | 0.01245 |
| Gene.4581::TRINITY_DN13079_c0_g3::g.4581::m.4581 | Meiotically up-regulated gene 190 protein                     | 806.979 | 3  | 1.27101 | 0.01762 |
| Gene.4649::TRINITY_DN13109_c0_g2::g.4649::m.4649 | Cytochrome c oxidase assembly protein COX20, mitochondrial    | 73.559  | 17 | 0.73461 | 0.00416 |
| Gene.4665::TRINITY_DN13117_c0_g6::g.4665::m.4665 | Monoxygenase CTB7                                             | 196.052 | 20 | 2.44037 | 0.01564 |
| Gene.4868::TRINITY_DN13182_c0_g2::g.4868::m.4868 | Mitochondrial presequence protease                            | 1541.17 | 44 | 0.74672 | 0.0194  |
| Gene.4965::TRINITY_DN13228_c0_g1::g.4965::m.4965 | Probable T-complex protein 1 subunit eta                      | 831.247 | 44 | 0.83094 | 0.03208 |
| Gene.5140::TRINITY_DN13416_c0_g1::g.5140::m.5140 | 30S ribosomal protein S12, chloroplastic                      | 204.912 | 28 | 2.12175 | 0.00542 |
| Gene.5260::TRINITY_DN13571_c0_g2::g.5260::m.5260 | Sphingolipid C4-hydroxylase SUR2                              | 271.166 | 12 | 1.22222 | 0.00693 |
| Gene.5288::TRINITY_DN13606_c0_g2::g.5288::m.5288 | Monoxygenase                                                  | 241.891 | 23 | 1.68456 | 0.01026 |
| Gene.5452::TRINITY_DN13766_c0_g2::g.5452::m.5452 | Mitochondrial-processing peptidase subunit alpha              | 694.501 | 37 | 0.78366 | 0.00091 |
| Gene.55::TRINITY_DN10100_c0_g1::g.55::m.55       | U3 small nucleolar ribonucleoprotein protein IMP3             | 141.739 | 10 | 0.77485 | 0.01533 |
| Gene.5579::TRINITY_DN1390_c0_g1::g.5579::m.5579  | Putative amidase ARB_02965                                    | 537.339 | 4  | 1.3482  | 0.03155 |
| Gene.571::TRINITY_DN10722_c1_g1::g.571::m.571    | Putative amidase C869.01                                      | 619.387 | 3  | 1.365   | 0.01406 |
| Gene.5752::TRINITY_DN14117_c0_g1::g.5752::m.5752 | Alpha-1,2-mannosyltransferase alg9                            | 376.326 | 5  | 1.76927 | 0.02433 |
| Gene.5807::TRINITY_DN14158_c0_g3::g.5807::m.5807 | Altered inheritance of mitochondria protein 18, mitochondrial | 119.398 | 35 | 0.78018 | 0.00356 |
| Gene.5842::TRINITY_DN14178_c1_g2::g.5842::m.5842 | Vacuolar protein-sorting-associated protein 11 homolog        | 444.121 | 3  | 1.23214 | 0.00232 |
| Gene.5887::TRINITY_DN14221_c0_g1::g.5887::m.5887 | 2,3-bisphosphoglycerate-independent phosphoglycerate mutase   | 548.51  | 61 | 0.79611 | 0.01204 |
| Gene.5958::TRINITY_DN14264_c0_g4::g.5958::m.5958 | UBX domain-containing protein 1                               | 245.358 | 35 | 0.80156 | 0.0165  |
| Gene.6376::TRINITY_DN14570_c0_g3::g.6376::m.6376 | Lon protease homolog, mitochondrial                           | 1607.81 | 39 | 0.7092  | 0.0051  |
| Gene.6401::TRINITY_DN14592_c0_g2::g.6401::m.6401 | Peroxisomal oxidoreductase                                    | 269.24  | 34 | 0.69539 | 0.0088  |
| Gene.6534::TRINITY_DN14669_c0_g1::g.6534::m.6534 | Mannan polymerase II complex ANP1 subunit                     | 484.182 | 6  | 1.30858 | 0.02079 |
| Gene.6555::TRINITY_DN14688_c0_g2::g.6555::m.6555 | Exosome complex component rrp45                               | 312.383 | 17 | 0.75    | 0.01021 |
| Gene.6610::TRINITY_DN14705_c0_g6::g.6610::m.6610 | Zinc-type alcohol dehydrogenase-like protein C16A3.02c        | 176.407 | 21 | 1.51298 | 0.01543 |
| Gene.6752::TRINITY_DN14798_c0_g2::g.6752::m.6752 | Nuclear polyadenylated RNA-binding protein NAB2               | 72.0182 | 7  | 0.80096 | 0.00476 |
| Gene.6806::TRINITY_DN14838_c0_g2::g.6806::m.6806 | Acyl-CoA dehydrogenase family member 9, mitochondrial         | 48.1358 | 17 | 1.28484 | 0.02829 |
| Gene.6807::TRINITY_DN14840_c1_g1::g.6807::m.6807 | Probable quinone oxidoreductase                               | 229.565 | 2  | 0.81269 | 0.0371  |
| Gene.683::TRINITY_DN10799_c0_g2::g.683::m.683    | Short-chain dehydrogenase/reductase ATR7                      | 80.4925 | 70 | 0.74672 | 0.01411 |
| Gene.6863::TRINITY_DN14869_c0_g4::g.6863::m.6863 | Tyrosinase ustQ                                               | 131.724 | 12 | 1.34611 | 0.0009  |
| Gene.6949::TRINITY_DN14942_c0_g1::g.6949::m.6949 | Histone acetyltransferase ESA1                                | 770     | 3  | 1.23048 | 0.0074  |
| Gene.6995::TRINITY_DN1496_c0_g1::g.6995::m.6995  | Ribokinase                                                    | 195.282 | 21 | 0.75901 | 0.00103 |
| Gene.7044::TRINITY_DN15000_c0_g1::g.7044::m.7044 | Uricase                                                       | 373.244 | 40 | 1.57333 | 0.0009  |
| Gene.7130::TRINITY_DN1505_c0_g1::g.7130::m.7130  | Proline utilization trans-activator                           | 55.0694 | 1  | 1.72773 | 0.04687 |
| Gene.7292::TRINITY_DN15158_c0_g2::g.7292::m.7292 | re-mRNA-splicing factor cwf19                                 | 400.593 | 2  | 1.32108 | 0.00065 |
| Gene.7383::TRINITY_DN15207_c0_g1::g.7383::m.7383 | DOA4-independent degradation protein 4                        | 200.29  | 15 | 1.22717 | 0.00808 |
| Gene.7421::TRINITY_DN15226_c0_g2::g.7421::m.7421 | Transcriptional regulatory protein dep1                       | 73.559  | 3  | 0.71625 | 0.03347 |
| Gene.7453::TRINITY_DN1524_c0_g1::g.7453::m.7453  | Oxidoreductase andH                                           | 149.443 | 16 | 1.33502 | 0.0311  |
| Gene.7509::TRINITY_DN15280_c0_g2::g.7509::m.7509 | O-acetyltransferase ptmV                                      | 110.923 | 2  | 1.69618 | 0.02163 |
| Gene.7575::TRINITY_DN15315_c0_g2::g.7575::m.7575 | Probable aminotransferase acII                                | 449.514 | 2  | 1.23214 | 0.00928 |
| Gene.7593::TRINITY_DN15322_c0_g1::g.7593::m.7593 | SAGA-associated factor 29                                     | 102.834 | 3  | 1.24383 | 0.01895 |
| Gene.7599::TRINITY_DN15326_c0_g1::g.7599::m.7599 | Thioredoxin reductase gliT                                    | 279.641 | 33 | 1.45659 | 0.03178 |
| Gene.763::TRINITY_DN10857_c0_g2::g.763::m.763    | t-SNARE affecting a late Golgi compartment protein 1          | 56.9954 | 15 | 0.74927 | 0.01364 |

|                                                  |                                                                                                           |         |    |         |         |
|--------------------------------------------------|-----------------------------------------------------------------------------------------------------------|---------|----|---------|---------|
| Gene.7630::TRINITY_DN15343_c0_g1::g.7630::m.7630 | Uncharacterized transcriptional regulatory protein C3C7.04                                                | 129.798 | 2  | 1.32468 | 0.01331 |
| Gene.7833::TRINITY_DN15451_c0_g4::g.7833::m.7833 | Putative nitroreductase HBN1                                                                              | 42.743  | 34 | 0.77021 | 0.01314 |
| Gene.7887::TRINITY_DN15476_c0_g2::g.7887::m.7887 | Failed axon connections                                                                                   | 75.0998 | 27 | 0.78412 | 0.00537 |
| Gene.7910::TRINITY_DN15485_c0_g1::g.7910::m.7910 | Bifunctional solanapyrone synthase                                                                        | 184.882 | 1  | 1.86533 | 0.00296 |
| Gene.7920::TRINITY_DN15494_c0_g1::g.7920::m.7920 | Probable RNA-binding protein 19                                                                           | 93.9745 | 53 | 0.75718 | 0.01876 |
| Gene.797::TRINITY_DN10880_c0_g3::g.797::m.797    | Acid phosphatase                                                                                          | 152.525 | 10 | 1.67618 | 0.03717 |
| Gene.8048::TRINITY_DN15572_c0_g1::g.8048::m.8048 | Translation machinery-associated protein 7                                                                | 53.5286 | 20 | 0.59872 | 0.00419 |
| Gene.8237::TRINITY_DN15683_c0_g1::g.8237::m.8237 | Uncharacterized transcriptional regulatory protein C1327.01c                                              | 60.8474 | 1  | 1.52674 | 0.04518 |
| Gene.8367::TRINITY_DN15727_c0_g2::g.8367::m.8367 | Trimethyllysine dioxygenase                                                                               | 494.197 | 11 | 1.29008 | 0.00744 |
| Gene.8371::TRINITY_DN15728_c0_g1::g.8371::m.8371 | Phosphatidylglycerol phospholipase C                                                                      | 134.806 | 8  | 1.59024 | 0.01076 |
| Gene.838::TRINITY_DN10913_c0_g1::g.838::m.838    | Ribosomal RNA-processing protein 14                                                                       | 90.8929 | 2  | 0.72237 | 0.00876 |
| Gene.8380::TRINITY_DN15733_c1_g1::g.8380::m.8380 | Probable D-xylulose reductase A                                                                           | 120.168 | 34 | 0.81628 | 0.00551 |
| Gene.8557::TRINITY_DN15826_c0_g3::g.8557::m.8557 | 4-trimethylaminobutyraldehyde dehydrogenase                                                               | 164.466 | 22 | 1.39848 | 0.03785 |
| Gene.8690::TRINITY_DN1590_c0_g1::g.8690::m.8690  | Proline iminopeptidase PfmaB                                                                              | 541.576 | 9  | 1.23131 | 0.00397 |
| Gene.8743::TRINITY_DN15947_c0_g1::g.8743::m.8743 | T-complex protein 1 subunit delta                                                                         | 742.265 | 49 | 0.80668 | 0.00732 |
| Gene.8799::TRINITY_DN15972_c0_g1::g.8799::m.8799 | Dihydrodipolyllysine-residue acetyltransferase component of pyruvate dehydrogenase complex, mitochondrial | 615.15  | 53 | 0.72761 | 0.00221 |
| Gene.880::TRINITY_DN10955_c0_g1::g.880::m.880    | Uncharacterized protein C56F8.02                                                                          | 1506.12 | 9  | 1.20147 | 0.00179 |
| Gene.8809::TRINITY_DN15975_c0_g1::g.8809::m.8809 | Probable U6 snRNA-associated Sm-like protein LSM4                                                         | 143.665 | 41 | 0.79503 | 0.00594 |
| Gene.8893::TRINITY_DN1601_c0_g1::g.8893::m.8893  | Ribosome biogenesis protein nsa2                                                                          | 451.825 | 2  | 0.59251 | 0.00332 |
| Gene.8981::TRINITY_DN16076_c0_g1::g.8981::m.8981 | Probable T-complex protein 1 subunit beta                                                                 | 791.956 | 59 | 0.80699 | 0.00363 |
| Gene.9102::TRINITY_DN16125_c0_g3::g.9102::m.9102 | ABC multidrug transporter atrF                                                                            | 1181.39 | 3  | 1.36967 | 0.03644 |
| Gene.9137::TRINITY_DN16132_c0_g2::g.9137::m.9137 | Proteasome subunit alpha type-4                                                                           | 343.969 | 63 | 0.79235 | 0.00021 |
| Gene.9235::TRINITY_DN16158_c0_g1::g.9235::m.9235 | Nuclear cap-binding protein subunit 2                                                                     | 192.971 | 8  | 0.73511 | 0.00365 |
| Gene.9273::TRINITY_DN16171_c0_g1::g.9273::m.9273 | Phosphate-repressible acid phosphatase                                                                    | 292.352 | 5  | 1.45861 | 0.04885 |
| Gene.9811::TRINITY_DN16322_c0_g1::g.9811::m.9811 | 15-cis-phytoene desaturase, chloroplastic/chromoplastic                                                   | 52.7582 | 19 | 1.21113 | 0.0251  |
| Gene.9826::TRINITY_DN16324_c0_g1::g.9826::m.9826 | Uncharacterized protein YGR266W                                                                           | 397.127 | 2  | 1.21857 | 0.01486 |
| Gene.9894::TRINITY_DN16342_c0_g1::g.9894::m.9894 | Tat-binding homolog 7                                                                                     | 671.389 | 5  | 1.2531  | 0.03254 |
| Gene.9906::TRINITY_DN16346_c0_g1::g.9906::m.9906 | Mitochondrial import inner membrane translocase subunit tim23                                             | 195.282 | 28 | 0.73461 | 0.01813 |
| Gene.9944::TRINITY_DN16356_c0_g1::g.9944::m.9944 | Nucleoprotein TPR                                                                                         | 236.113 | 15 | 1.24346 | 0.02617 |
| Gene.9988::TRINITY_DN16365_c0_g5::g.9988::m.9988 | Itaconate transport protein                                                                               | 271.937 | 4  | 2.90371 | 0.02744 |
